# Supplementary material
Source: publisher site journal article supplement (https://www.spandidos-publications.com/5197/downloadSupplementary)
Supplement: Supplementary file 1 [file downloadSupplementary]

## Sheet: FDPS_vs_Ctrl_Sig_DEG
Table SI. Detailed information on the DEGs between FDPS-OE vs. Ctrl samples.
Gene	logFC	logCPM	PValue	FDR	Ctrl_1st	Ctrl_2nd	FDPS_1st	FDPS_2nd	Symbol	Chr	GeneType	Description
ENSG00000202198.1	-1.02332	4.64602	1.01068e-27	2.40525e-24	112.91	66.1	52.81	34.37	RN7SK	chr6	misc_RNA	RNA, 7SK small nuclear
ENSG00000224786.1	2.28142	-1.81259	0.000225126	0.00641631	0.24	0.05	0.1	1.3	CETN4P	chr4	unitary_pseudogene	centrin EF-hand protein 4, pseudogene
ENSG00000279686.1	3.61416	-2.49087	0.000297218	0.00788111	0	0.02	0.1	0.29	ECSCR	chr5	protein_coding	endothelial cell surface expressed chemotaxis and apoptosis regulator
ENSG00000140488.14	-1.47335	-1.54902	0.00256869	0.0370249	0.09	0.12	0.05	0.03	CELF6	chr15	protein_coding	CUGBP, Elav-like family member 6
ENSG00000274012.1	-1.43521	3.74815	1.03023e-40	3.67765e-37	71.03	44.79	27.63	14.67	Metazoa_SRP	chr14	misc_RNA
ENSG00000135838.13	1.29853	-0.0173617	3.98136e-06	0.000272009	0.11	0.18	0.29	0.44	NPL	chr1	protein_coding	N-acetylneuraminate pyruvate lyase (dihydrodipicolinate synthase)
ENSG00000228140.1	2.63913	-1.81325	4.10314e-05	0.00173083	0.01	0.01	0.08	0.05	RP3-467K16.4	chr1	lincRNA
ENSG00000271447.5	-3.88726	-1.77559	9.57295e-08	1.22816e-05	0.17	0.16	0	0.02	MMP28	chr17	protein_coding	matrix metallopeptidase 28
ENSG00000164509.13	1.12751	-0.906835	0.0023762	0.0349431	0.03	0.08	0.12	0.12	IL31RA	chr5	protein_coding	interleukin 31 receptor A
ENSG00000012504.13	-2.48303	-2.0456	0.000353561	0.00901517	0.12	0.06	0.01	0.02	NR1H4	chr12	protein_coding	nuclear receptor subfamily 1, group H, member 4
ENSG00000070808.15	-1.36597	-0.53243	5.23542e-05	0.0021004	0.17	0.14	0.03	0.09	CAMK2A	chr5	protein_coding	calcium/calmodulin-dependent protein kinase II alpha
ENSG00000183044.11	-2.85073	-2.49035	0.00249347	0.0362199	0.02	0.04	0	0.01	ABAT	chr16	protein_coding	4-aminobutyrate aminotransferase
ENSG00000251301.6	-5.40428	-2.96465	0.00202018	0.0310507	0	0.11	0	0	RP11-81H14.2	chr12	lincRNA
ENSG00000257283.1	5.31092	-2.9647	0.00202018	0.0310507	0	0	0.4	0.05	RP11-1060G2.1	chr12	antisense
ENSG00000204388.6	1.31567	6.82232	2.89352e-55	1.37722e-51	22.45	22.67	52.5	59.23	HSPA1B	chr6	protein_coding	heat shock 70kDa protein 1B
ENSG00000143226.13	-1.49776	-1.15535	0.000462315	0.0109024	0.28	0.16	0.1	0.05	FCGR2A	chr1	protein_coding	Fc fragment of IgG, low affinity IIa, receptor (CD32)
ENSG00000241978.9	1.18129	-1.00576	0.00389509	0.0497255	0.04	0.03	0.1	0.05	AKAP2	chr9	protein_coding	A kinase (PRKA) anchor protein 2
ENSG00000175820.3	1.01993	-0.535063	0.002526	0.0366366	0.02	0.02	0.03	0.04	CCDC168	chr13	protein_coding	coiled-coil domain containing 168
ENSG00000147697.8	1.60822	-0.521114	3.88625e-06	0.000268076	0.09	0.11	0.33	0.28	GSDMC	chr8	protein_coding	gasdermin C
ENSG00000274150.1	1.47151	-1.22844	0.000778714	0.016022	0.08	0.15	0.33	0.32	FADS2P1	chr11	unprocessed_pseudogene	fatty acid desaturase 2 pseudogene 1
ENSG00000060982.14	3.27844	-2.09064	4.13685e-05	0.00174083	0	0	0.03	0.03	BCAT1	chr12	protein_coding	branched chain amino-acid transaminase 1, cytosolic
ENSG00000256196.1	-2.04217	-2.08908	0.00273373	0.0387251	0.35	0.25	0.08	0.06	RP11-881M11.4	chr11	antisense
ENSG00000258791.7	1.30351	-1.1575	0.00323503	0.0437849	0.11	0.06	0.27	0.16	LINC00520	chr14	lincRNA	long intergenic non-protein coding RNA 520
ENSG00000279901.1	-1.31997	-1.11028	0.00158552	0.026588	0.4	0.23	0.11	0.13	CTD-2270P14.2	chr16	TEC
ENSG00000224046.1	-2.28277	-1.0038	1.07109e-07	1.34159e-05	0.79	0.91	0.09	0.25	AC005076.5	chr7	antisense
ENSG00000230666.5	-1.42281	-1.37889	0.00195707	0.0307764	0.12	0.15	0.08	0.02	CEACAM22P	chr19	transcribed_unprocessed_pseudogene	carcinoembryonic antigen-related cell adhesion molecule 22, pseudogene
ENSG00000242085.1	-3.87359	-2.43309	0.000158622	0.00494533	0.71	0.55	0.07	0	RPS20P33	chr14	processed_pseudogene	ribosomal protein S20 pseudogene 33
ENSG00000136695.14	6.21988	-2.37988	4.33307e-06	0.000289798	0	0	0.03	0.13	IL36RN	chr2	protein_coding	interleukin 36 receptor antagonist
ENSG00000186301.8	-1.04723	0.566527	4.24348e-06	0.000286333	0.57	0.9	0.28	0.44	MST1P2	chr1	unprocessed_pseudogene	macrophage stimulating 1 (hepatocyte growth factor-like) pseudogene 2
ENSG00000235888.1	5.16314	-3.04703	0.00401325	0.0499175	0	0	0.03	0.12	AF064858.8	chr21	lincRNA
ENSG00000278189.1	-5.40428	-2.96465	0.00202018	0.0310507	0	1.59	0	0	RNA5-8S5	chr21	rRNA	RNA, 5.8S ribosomal 5
ENSG00000221955.10	-1.18311	1.02954	1.84772e-09	3.96745e-07	0.72	0.62	0.34	0.24	SLC12A8	chr3	protein_coding	solute carrier family 12, member 8
ENSG00000146005.3	6.06155	-2.49093	1.68886e-05	0.000904889	0	0	0.04	0.05	PSD2	chr5	protein_coding	pleckstrin and Sec7 domain containing 2
ENSG00000134042.12	-3.10926	-2.32712	0.000440582	0.0104851	0.02	0.07	0	0	MRO	chr18	protein_coding	maestro
ENSG00000152207.7	3.31926	-2.67521	0.00192477	0.0304867	0.01	0	0.06	0	CYSLTR2	chr13	protein_coding	cysteinyl leukotriene receptor 2
ENSG00000281406.1	1.09865	-0.394064	0.000563034	0.0124259	0.12	0.14	0.29	0.26	BLACAT1	chr1	lincRNA	bladder cancer associated transcript 1 (non-protein coding)
ENSG00000213344.2	6.21962	-2.38002	8.5514e-06	0.000506662	0	0	0.66	0.31	PCNPP3	chr12	processed_pseudogene	PEST containing nuclear protein pseudogene 3
ENSG00000208036.1	-1.44352	-1.27516	0.00115367	0.0211572	6.43	5.03	2.03	2.08	MIR106B	chr7	miRNA	microRNA 106b
ENSG00000169435.13	3.31941	-2.67514	0.00192477	0.0304867	0	0	0.03	0.02	RASSF6	chr4	protein_coding	Ras association (RalGDS/AF-6) domain family member 6
ENSG00000248771.5	5.31101	-2.96466	0.00202018	0.0310507	0	0	0.04	0.03	LINC01207	chr4	lincRNA	long intergenic non-protein coding RNA 1207
ENSG00000241749.4	1.43067	-1.35417	0.00195707	0.0307764	0.01	0.13	0.15	0.26	RPSAP52	chr12	transcribed_processed_pseudogene	ribosomal protein SA pseudogene 52
ENSG00000073282.12	-1.19467	0.208754	2.79083e-06	0.000206478	0.25	0.17	0.08	0.1	TP63	chr3	protein_coding	tumor protein p63
ENSG00000239510.2	-3.4921	-2.67454	0.00192477	0.0304867	0.29	0.41	0	0.05	RPL9P5	chr14	processed_pseudogene	ribosomal protein L9 pseudogene 5
ENSG00000277873.1	-5.66317	-2.81183	0.000513026	0.0116927	0.24	0.21	0	0	RP11-33N14.3	chr12	antisense
ENSG00000268736.1	-1.92162	-1.64146	0.000562013	0.0124226	0.8	0.66	0.28	0.09	RP11-1281K21.6	chr4	processed_pseudogene
ENSG00000087085.13	1.53279	-0.925572	0.000146591	0.00465149	0.07	0.06	0.11	0.28	ACHE	chr7	protein_coding	acetylcholinesterase (Yt blood group)
ENSG00000269106.1	-1.40924	-0.84679	0.000165942	0.00512875	2.04	1.19	0.41	0.77	CTD-2619J13.23	chr19	antisense
ENSG00000268220.1	1.42443	-1.46247	0.00333972	0.0446934	0.06	0.1	0.08	0.35	RP11-379K17.12	chr3	antisense
ENSG00000167701.13	-2.59071	-1.51845	3.90577e-06	0.000268127	0.23	0.21	0.06	0.01	GPT	chr8	protein_coding	glutamic-pyruvate transaminase (alanine aminotransferase)
ENSG00000153495.10	2.15622	-1.35433	1.27723e-05	0.000718013	0	0.27	0.54	0.79	TEX29	chr13	protein_coding	testis expressed 29
ENSG00000164363.9	3.31969	-2.6753	0.00192477	0.0304867	0	0.01	0.1	0.05	SLC6A18	chr5	protein_coding	solute carrier family 6 (neutral amino acid transporter), member 18
ENSG00000178172.6	1.00334	2.78137	1.80683e-15	1.35788e-12	5.34	5.46	9.59	11.97	SPINK6	chr5	protein_coding	serine peptidase inhibitor, Kazal type 6
ENSG00000256139.2	-1.08968	-0.563645	0.00122372	0.0220348	0.76	0.88	0.39	0.37	RP11-968O1.5	chr12	sense_overlapping
ENSG00000280334.1	-3.78814	-2.48935	0.000158622	0.00494533	0.11	0.04	0.01	0	RP11-361L15.5	chr16	TEC
ENSG00000260578.1	-1.00924	1.92632	3.41467e-11	1.08351e-08	1.69	1.13	0.79	0.58	CTD-2541J13.1	chr18	lincRNA
ENSG00000245812.2	-5.40611	-2.96377	0.00202018	0.0310507	0.06	0.04	0	0	RP11-175K6.1	chr5	lincRNA
ENSG00000261644.1	2.47698	-1.92545	0.000207675	0.00606817	0.05	0.04	0.29	0.23	RP11-327F22.2	chr16	antisense
ENSG00000164400.5	1.6035	-1.46298	0.00112082	0.0206773	0.04	0.28	0.36	0.65	CSF2	chr5	protein_coding	colony stimulating factor 2 (granulocyte-macrophage)
ENSG00000243137.7	1.00361	1.78955	1.59329e-10	4.37511e-08	0.59	1.2	1.97	1.66	PSG4	chr19	protein_coding	pregnancy specific beta-1-glycoprotein 4
ENSG00000168334.8	5.31089	-2.96472	0.00202018	0.0310507	0	0	0.04	0	XIRP1	chr3	protein_coding	xin actin binding repeat containing 1
ENSG00000162892.15	1.8608	0.756021	4.63976e-16	3.78578e-13	0.21	0.39	1.06	1.17	IL24	chr1	protein_coding	interleukin 24
ENSG00000104213.12	2.47333	-2.22756	0.00093691	0.0183388	0.04	0	0.06	0.18	PDGFRL	chr8	protein_coding	platelet-derived growth factor receptor-like
ENSG00000166819.11	-2.41536	-2.08939	0.00100954	0.0192466	0.08	0.1	0.03	0	PLIN1	chr15	protein_coding	perilipin 1
ENSG00000255398.2	1.26788	1.5325	2.03333e-13	1.09481e-10	0.49	0.84	1.38	1.87	HCAR3	chr12	protein_coding	hydroxycarboxylic acid receptor 3
ENSG00000183018.8	1.07005	-0.170831	0.000224075	0.00641385	0.07	0.19	0.3	0.27	SPNS2	chr17	protein_coding	spinster homolog 2 (Drosophila)
ENSG00000242697.2	5.56801	-2.8127	0.000513026	0.0116927	0	0	0.17	0.17	RPL5P12	chr4	processed_pseudogene	ribosomal protein L5 pseudogene 12
ENSG00000262769.1	-1.48332	-1.25029	0.000778714	0.016022	0.8	0.53	0.33	0.13	RP11-1113L8.1	chr17	antisense
ENSG00000233956.1	3.20671	-2.7423	0.00356352	0.0467465	0	0.05	0.14	0.44	BTF3P6	chr21	processed_pseudogene	basic transcription factor 3 pseudogene 6
ENSG00000170231.15	-5.25711	-3.04664	0.00401325	0.0499175	0.1	0.17	0	0	FABP6	chr5	protein_coding	fatty acid binding protein 6, ileal
ENSG00000242607.1	-5.25711	-3.04664	0.00401325	0.0499175	0.11	0.19	0	0	RPS3AP34	chr8	processed_pseudogene	ribosomal protein S3a pseudogene 34
ENSG00000259265.1	5.88388	-2.61114	6.60175e-05	0.00252049	0	0	0.16	0.25	RP11-809H16.4	chr15	antisense
ENSG00000246731.2	1.81542	-1.74256	0.00150214	0.025454	0.03	0.04	0.11	0.15	MGC16275	chr17	antisense
ENSG00000130701.3	2.44116	-1.49134	6.58872e-06	0.000404646	0.03	0.03	0.18	0.13	RBBP8NL	chr20	protein_coding	RBBP8 N-terminal like
ENSG00000117215.14	5.16305	-3.04708	0.00401325	0.0499175	0	0	0.04	0.04	PLA2G2D	chr1	protein_coding	phospholipase A2, group IID
ENSG00000229191.1	-1.39387	-0.324524	1.09759e-05	0.000633234	0.33	0.23	0.13	0.08	RP11-168O16.1	chr1	antisense
ENSG00000167094.15	1.96638	-1.64325	0.000372043	0.00935283	0.02	0.04	0.11	0.14	TTC16	chr9	protein_coding	tetratricopeptide repeat domain 16
ENSG00000224939.1	1.86172	-1.88699	0.00256962	0.0370249	0.02	0.04	0.13	0.13	LINC00184	chr1	lincRNA	long intergenic non-protein coding RNA 184
ENSG00000168314.17	5.44537	-2.8866	0.00101766	0.0192466	0	0	0.01	0.07	MOBP	chr3	protein_coding	myelin-associated oligodendrocyte basic protein
ENSG00000246982.6	-1.77848	-1.88453	0.00369315	0.0477884	0.43	0.08	0.06	0.08	RP1-179N16.6	chr6	antisense
ENSG00000279289.1	-1.16885	-0.608803	0.00066118	0.0140387	0.22	0.15	0.06	0.1	RP3-331H24.6	chr6	TEC
ENSG00000159871.14	1.45282	-0.761298	7.84711e-05	0.00288414	0.02	0.15	0.26	0.23	LYPD5	chr19	protein_coding	LY6/PLAUR domain containing 5
ENSG00000281548.1	-1.15631	-1.00476	0.00389509	0.0497255	0.27	0.39	0.23	0.06	LINC00895	chr22	lincRNA	long intergenic non-protein coding RNA 895
ENSG00000118160.13	2.39633	-2.27647	0.00161345	0.0269141	0.02	0	0.03	0.05	SLC8A2	chr19	protein_coding	solute carrier family 8 (sodium/calcium exchanger), member 2
ENSG00000273951.1	-2.65962	-2.22645	0.000541153	0.012121	0.47	0.3	0	0.11	RP4-620E11.8	chr20	sense_intronic
ENSG00000168631.11	1.43331	-1.25226	0.00214461	0.0324318	0.04	0.03	0.1	0.07	DPCR1	chr6	protein_coding	diffuse panbronchiolitis critical region 1
ENSG00000234222.6	1.91724	-1.67538	0.000595769	0.0129977	0.07	0.05	0.21	0.23	RP11-315I20.1	chr1	antisense
ENSG00000168916.15	-2.41527	-2.37853	0.00276213	0.0388193	0.05	0.02	0.01	0	ZNF608	chr5	protein_coding	zinc finger protein 608
ENSG00000235568.6	-3.87236	-2.43366	0.000158622	0.00494533	0.02	0.05	0	0	NFAM1	chr22	protein_coding	NFAT activating protein with ITAM motif 1
ENSG00000204792.2	1.15847	1.1961	9.83906e-10	2.17817e-07	0.21	0.35	0.83	0.45	LINC01291	chr2	lincRNA	long intergenic non-protein coding RNA 1291
ENSG00000270441.1	-1.65441	-1.67396	0.00292185	0.0404275	0.22	0.18	0.05	0.07	RP11-694I15.7	chr3	unprocessed_pseudogene
ENSG00000269900.3	-1.31434	2.47807	1.86678e-22	3.33196e-19	33.34	19.28	11.46	9.34	RMRP	chr9	lincRNA	RNA component of mitochondrial RNA processing endoribonuclease
ENSG00000234796.1	-3.03014	-2.37851	0.000440582	0.0104851	0.47	0.29	0	0.08	AC113607.3	chr2	antisense
ENSG00000185432.11	-1.20335	0.944374	1.52808e-09	3.30598e-07	0.79	0.37	0.25	0.24	METTL7A	chr12	protein_coding	methyltransferase like 7A
ENSG00000262180.1	-1.92186	-0.868505	1.96233e-06	0.000153956	0.25	1.26	0.13	0.27	OCLM	chr1	protein_coding	oculomedin
ENSG00000269559.2	1.74212	-0.627559	2.27698e-06	0.000173866	0.13	0.12	0.23	0.61	RP11-629B11.5	chr4	antisense
ENSG00000231185.6	2.86541	-1.96521	5.76264e-05	0.00227306	0	0.04	0.17	0.19	AC005592.2	chr5	antisense
ENSG00000152439.12	-2.711	-1.43134	4.69298e-07	4.65354e-05	0.1	0.03	0.01	0.01	ZNF773	chr19	protein_coding	zinc finger protein 773
ENSG00000242741.1	5.44516	-2.88671	0.00101766	0.0192466	0	0	0.24	0.09	RP11-20B7.1	chr3	lincRNA
ENSG00000261122.6	1.27379	0.00312596	4.84198e-06	0.000314982	0.22	0.32	0.72	0.59	FLJ26245	chr16	lincRNA
ENSG00000258011.2	2.67011	-2.49102	0.00249347	0.0362199	0	0.15	0.96	0.15	HMGA1P3	chr12	processed_pseudogene	high mobility group AT-hook 1 pseudogene 3
ENSG00000228857.2	-5.25863	-3.0459	0.00401325	0.0499175	0.33	0.04	0	0	AC104653.1	chr2	lincRNA
ENSG00000248993.1	-1.55809	-1.61007	0.00385185	0.0492837	0.59	0.59	0.27	0.12	XXbac-BPG181M17.5	chr6	protein_coding
ENSG00000170965.9	-1.40584	-1.13278	0.000875713	0.0174398	0.56	0.36	0.19	0.15	PLAC1	chrX	protein_coding	placenta-specific 1
ENSG00000276757.1	5.44522	-2.88668	0.00101766	0.0192466	0	0	0.48	0.41	RN7SL192P	chr19	misc_RNA	RNA, 7SL, cytoplasmic 192, pseudogene
ENSG00000224397.5	-1.28057	-1.13417	0.00227106	0.0337095	0.18	0.31	0.08	0.12	LINC01272	chr20	lincRNA	long intergenic non-protein coding RNA 1272
ENSG00000250796.1	3.00581	-2.27681	0.000440582	0.0104851	0.08	0.07	0.8	0.59	RP11-723O4.3	chr3	processed_pseudogene
ENSG00000111728.10	5.16314	-3.04703	0.00401325	0.0499175	0	0	0	0.02	ST8SIA1	chr12	protein_coding	ST8 alpha-N-acetyl-neuraminide alpha-2,8-sialyltransferase 1
ENSG00000181085.14	-1.35132	-0.0341495	1.1931e-06	0.000101406	0.59	0.55	0.18	0.26	MAPK15	chr8	protein_coding	mitogen-activated protein kinase 15
ENSG00000164675.10	-1.40464	-0.273384	4.84018e-06	0.000314982	0.36	0.22	0.09	0.13	IQUB	chr7	protein_coding	IQ motif and ubiquitin domain containing
ENSG00000144671.10	3.45255	-1.96507	6.8202e-06	0.000415191	0.02	0	0.24	0.03	SLC22A14	chr3	protein_coding	solute carrier family 22, member 14
ENSG00000276168.1	-1.15777	4.04864	5.71807e-30	1.48452e-26	77.3	57.6	39.75	20.08	RN7SL1	chr14	misc_RNA	RNA, 7SL, cytoplasmic 1
ENSG00000272973.1	5.44516	-2.88671	0.00101766	0.0192466	0	0	0.31	0.12	KB-1125A3.11	chr22	antisense
ENSG00000245954.6	4.20657	-1.38084	1.07392e-10	3.11584e-08	0	0.03	0.36	0.31	RP11-18H21.1	chr4	lincRNA
ENSG00000111291.8	5.16317	-3.04702	0.00401325	0.0499175	0	0	0.02	0.19	GPRC5D	chr12	protein_coding	G protein-coupled receptor, class C, group 5, member D
ENSG00000256092.2	-1.55824	-0.624324	9.28791e-06	0.000543533	0.41	0.3	0.02	0.22	RP13-942N8.1	chr12	lincRNA
ENSG00000148204.11	-1.26635	-0.201611	1.79294e-05	0.000942964	0.19	0.16	0.09	0.05	CRB2	chr9	protein_coding	crumbs family member 2
ENSG00000274933.4	5.44519	-2.88669	0.00101766	0.0192466	0	0	0.05	0.03	TBC1D3I	chr17	protein_coding	TBC1 domain family, member 3I
ENSG00000258946.5	5.163	-3.04711	0.00401325	0.0499175	0	0	0.05	0.02	RP11-58E21.4	chr14	lincRNA
ENSG00000146192.14	5.44537	-2.8866	0.00101766	0.0192466	0	0	0.01	0.08	FGD2	chr6	protein_coding	FYVE, RhoGEF and PH domain containing 2
ENSG00000162398.11	1.62522	0.424625	9.43272e-11	2.77711e-08	0.23	0.37	0.99	0.89	C1orf177	chr1	protein_coding	chromosome 1 open reading frame 177
ENSG00000234409.6	-4.3672	-2.08791	9.87971e-07	8.60198e-05	0.36	0.08	0.02	0	AC006547.14	chr22	protein_coding
ENSG00000185634.11	1.02388	-0.580904	0.00297756	0.040901	0.06	0.06	0.2	0.05	SHC4	chr15	protein_coding	SHC (Src homology 2 domain containing) family, member 4
ENSG00000248367.1	-1.0336	-0.740804	0.00364995	0.0474474	1.76	1.54	0.73	0.87	CTB-129O4.1	chr5	antisense
ENSG00000185518.11	-1.22617	2.32953	1.48919e-18	1.77201e-15	0.58	0.49	0.22	0.23	SV2B	chr15	protein_coding	synaptic vesicle glycoprotein 2B
ENSG00000275318.1	-1.38017	-0.865557	0.000239896	0.00669693	1.1	0.66	0.32	0.33	RP11-526D8.11	chr9	unprocessed_pseudogene
ENSG00000278467.1	-1.43556	-0.59262	3.31259e-05	0.0014851	1.79	1.02	0.58	0.42	RP11-504P24.9	chr1	lincRNA
ENSG00000269296.1	2.00005	-1.46252	8.76979e-05	0.00314633	0.03	0.03	0.07	0.16	AC005614.3	chr19	antisense
ENSG00000259384.6	-9.7022	0.582312	6.26592e-56	3.57884e-52	2.15	4.06	0	0	GH1	chr17	protein_coding	growth hormone 1
ENSG00000158859.9	-1.21992	0.384103	5.28522e-07	5.09142e-05	0.16	0.14	0.07	0.05	ADAMTS4	chr1	protein_coding	ADAM metallopeptidase with thrombospondin type 1 motif, 4
ENSG00000259407.1	1.63164	-1.32775	0.000883618	0.0175482	0.14	0.15	0.54	0.38	RP11-158M2.3	chr15	antisense
ENSG00000172296.12	-2.04078	-1.1778	3.18905e-06	0.00022655	0.13	0.06	0.02	0.02	SPTLC3	chr20	protein_coding	serine palmitoyltransferase, long chain base subunit 3
ENSG00000240476.1	2.13038	-1.22843	5.00597e-06	0.00032126	0.09	0.15	0.3	0.78	LINC00973	chr3	lincRNA	long intergenic non-protein coding RNA 973
ENSG00000230337.1	-1.65585	-1.54898	0.00170196	0.0278536	0.63	0.95	0.2	0.3	RP4-635E18.6	chr1	antisense
ENSG00000141255.12	4.06704	-2.18056	1.26391e-05	0.000712369	0.01	0	0.06	0.16	SPATA22	chr17	protein_coding	spermatogenesis associated 22
ENSG00000226913.1	2.76155	-2.43424	0.00140599	0.0244384	0.01	0.01	0.07	0.07	BSN-AS2	chr3	lincRNA	BSN antisense RNA 2 (head to head)
ENSG00000280527.1	-3.49301	-2.6741	0.00192477	0.0304867	2.2	1.2	0	0.24	AL031587.1	chr22	miRNA
ENSG00000174343.5	1.12619	-0.906326	0.00385083	0.0492837	0.11	0.12	0.29	0.2	CHRNA9	chr4	protein_coding	cholinergic receptor, nicotinic, alpha 9 (neuronal)
ENSG00000171617.13	1.88632	-0.761057	1.81102e-06	0.000144466	0.02	0.04	0.19	0.06	ENC1	chr5	protein_coding	ectodermal-neural cortex 1 (with BTB domain)
ENSG00000234913.1	-5.88	-2.67499	0.000130667	0.00427936	0.02	0.12	0	0	XXbac-B476C20.13	chr22	sense_intronic
ENSG00000281613.2	-5.77511	-2.74207	0.000258817	0.00705278	0.06	0.3	0	0	RP11-506B6.7	chr6	protein_coding
ENSG00000236814.1	5.68119	-2.74232	0.000258817	0.00705278	0	0	0.1	0.17	RP11-446E9.1	chr8	processed_pseudogene
ENSG00000274735.1	-5.88061	-2.67469	0.000130667	0.00427936	1.98	4.33	0	0	FP236383.3	chr21	miRNA
ENSG00000173110.7	2.89662	2.65661	1.21331e-81	8.66244e-78	0.37	0.69	3.82	4.18	HSPA6	chr1	protein_coding	heat shock 70kDa protein 6 (HSP70B')
ENSG00000172974.11	1.91331	-1.13571	1.28525e-05	0.000721103	0.06	0.25	0.57	0.66	AC007318.5	chr2	processed_pseudogene
ENSG00000234292.3	-1.76548	-1.741	0.00214025	0.0323907	0.37	0.28	0.07	0.12	RP11-213H15.1	chr5	lincRNA
ENSG00000234817.2	1.10607	-0.435782	0.000658334	0.0140387	0.1	0.22	0.44	0.27	RP3-400B16.1	chr6	lincRNA
ENSG00000127241.16	-2.1029	-1.25128	5.00597e-06	0.00032126	0.04	0.07	0.02	0.01	MASP1	chr3	protein_coding	mannan-binding lectin serine peptidase 1 (C4/C2 activating component of Ra-reactive factor)
ENSG00000279138.1	3.20623	-2.74224	0.00356352	0.0467465	0.01	0	0.1	0.03	KB-1742H10.3	chr8	TEC
ENSG00000171931.12	1.69228	0.439335	8.23756e-12	3.22258e-09	0.08	0.21	0.39	0.58	FBXW10	chr17	protein_coding	F-box and WD repeat domain containing 10
ENSG00000279953.1	-2.15374	-1.64257	0.000231137	0.00656143	0.14	0.39	0.03	0.09	RP11-338K17.5	chr12	TEC
ENSG00000163803.12	-1.13624	-0.628231	0.00168952	0.0277322	0.03	0.23	0.06	0.07	PLB1	chr2	protein_coding	phospholipase B1
ENSG00000214514.7	1.06006	-0.659763	0.00309053	0.0421285	0.07	0.1	0.17	0.19	KRT42P	chr17	transcribed_unprocessed_pseudogene	keratin 42 pseudogene
ENSG00000276278.1	-3.1099	-2.32684	0.000440582	0.0104851	0.11	0.26	0.04	0	RP11-182J1.3	chr15	antisense
ENSG00000178084.1	2.13138	-1.70857	0.000232188	0.00656244	0.07	0.03	0.25	0.16	HTR3C	chr3	protein_coding	5-hydroxytryptamine (serotonin) receptor 3C, ionotropic
ENSG00000162461.7	-1.83436	-1.11121	1.93958e-05	0.000998028	0.16	0.22	0.01	0.1	SLC25A34	chr1	protein_coding	solute carrier family 25, member 34
ENSG00000100197.20	-1.92914	-1.04619	5.06023e-06	0.000323289	0.29	0.4	0.12	0.06	CYP2D6	chr22	protein_coding	cytochrome P450, family 2, subfamily D, polypeptide 6
ENSG00000267338.1	-3.37929	-2.74148	0.00356352	0.0467465	0.3	0.27	0.04	0	KB-7G2.9	chr22	lincRNA
ENSG00000203872.6	-1.46539	-0.518445	1.41367e-05	0.000779377	0.3	0.34	0.1	0.13	C6orf163	chr6	protein_coding	chromosome 6 open reading frame 163
ENSG00000223764.2	-1.32845	-0.459357	5.64937e-05	0.00224388	0.78	0.47	0.26	0.23	RP11-54O7.3	chr1	lincRNA
ENSG00000120471.14	-3.2574	-2.8114	0.00356352	0.0467465	0.07	0.01	0.01	0	TP53AIP1	chr11	protein_coding	tumor protein p53 regulated apoptosis inducing protein 1
ENSG00000213542.3	1.22972	-1.0474	0.00329493	0.044331	0.31	0.24	0.66	0.64	RP11-467H10.1	chr7	processed_pseudogene
ENSG00000135333.13	-1.33455	0.409238	3.07967e-08	4.60467e-06	0.27	0.17	0.09	0.08	EPHA7	chr6	protein_coding	EPH receptor A7
ENSG00000197587.10	-1.25105	-0.657857	0.000469118	0.0110355	0.22	0.28	0.11	0.1	DMBX1	chr1	protein_coding	diencephalon/mesencephalon homeobox 1
ENSG00000242529.1	-3.25767	-2.81124	0.00356352	0.0467465	1.33	0.12	0	0.12	AHCYP8	chr1	processed_pseudogene	adenosylhomocysteinase pseudogene 8
ENSG00000124203.5	-1.24217	1.20423	2.94028e-11	9.99625e-09	0.39	0.22	0.1	0.15	ZNF831	chr20	protein_coding	zinc finger protein 831
ENSG00000267583.5	-1.11306	-0.549173	0.00122372	0.0220348	0.84	1.32	0.62	0.38	RP11-322E11.5	chr18	lincRNA
ENSG00000279865.1	1.21559	-0.986038	0.00166039	0.0274756	0.05	0.2	0.28	0.33	RP11-69M1.6	chr12	TEC
ENSG00000175879.8	1.02494	-0.580941	0.00297756	0.040901	0.11	0.16	0.27	0.27	HOXD8	chr2	protein_coding	homeobox D8
ENSG00000259088.1	3.42478	-2.6111	0.00103577	0.0194858	0	0.05	0.16	0.6	CTD-2017C7.2	chr14	antisense
ENSG00000234353.2	-2.16323	-1.81251	0.000617813	0.0133764	0.18	0.54	0.11	0.05	AP000347.4	chr22	transcribed_unprocessed_pseudogene
ENSG00000143199.17	-1.80197	-1.13349	3.01447e-05	0.00138404	0.09	0.1	0.03	0.02	ADCY10	chr1	protein_coding	adenylate cyclase 10 (soluble)
ENSG00000175356.12	2.22861	-2.0905	0.00169163	0.0277322	0.01	0.02	0.06	0.07	SCUBE2	chr11	protein_coding	signal peptide, CUB domain, EGF-like 2
ENSG00000267515.1	-5.7745	-2.74236	0.000258817	0.00705278	0	0.53	0	0	RP11-861E21.3	chr18	processed_pseudogene
ENSG00000272209.1	-5.66317	-2.81183	0.000513026	0.0116927	0.15	0.13	0	0	RP3-500L14.2	chr6	lincRNA
ENSG00000231125.2	-2.71928	-1.88614	7.0724e-05	0.00267161	0.28	0.55	0.06	0.06	AF129075.5	chr21	sense_intronic
ENSG00000143502.14	5.44516	-2.88671	0.00101766	0.0192466	0	0	0.05	0.02	SUSD4	chr1	protein_coding	sushi domain containing 4
ENSG00000157680.15	1.03148	-0.159363	0.000342591	0.0087983	0.02	0.05	0.06	0.08	DGKI	chr7	protein_coding	diacylglycerol kinase, iota
ENSG00000102362.15	-1.47359	-1.54885	0.00256869	0.0370249	0.05	0.06	0.02	0.02	SYTL4	chrX	protein_coding	synaptotagmin-like 4
ENSG00000050438.16	-3.59911	-2.60941	0.0005556	0.0122999	0.03	0	0	0	SLC4A8	chr12	protein_coding	solute carrier family 4, sodium bicarbonate cotransporter, member 8
ENSG00000262050.1	-1.02116	0.792763	1.67468e-06	0.000136152	4.38	4.6	2.04	2.36	RP11-74E22.3	chr17	antisense
ENSG00000105707.13	-2.0422	-2.08909	0.00273373	0.0387251	0.13	0.09	0.04	0.01	HPN	chr19	protein_coding	hepsin
ENSG00000232303.2	1.40285	-0.102226	2.98026e-06	0.000214939	0.51	0.35	1.34	0.89	DFFBP1	chr9	processed_pseudogene	DNA fragmentation factor, 40kDa, beta polypeptide pseudogene 1
ENSG00000134817.10	5.163	-3.04711	0.00401325	0.0499175	0	0	0.04	0.01	APLNR	chr11	protein_coding	apelin receptor
ENSG00000008311.14	-1.79793	-0.236177	8.17469e-09	1.50615e-06	0.4	0.27	0.04	0.15	AASS	chr7	protein_coding	aminoadipate-semialdehyde synthase
ENSG00000266710.2	-5.40702	-2.96333	0.00202018	0.0310507	0.85	0.08	0	0	RN7SL48P	chrX	misc_RNA	RNA, 7SL, cytoplasmic 48, pseudogene
ENSG00000281035.1	-1.22951	-0.431547	0.000160316	0.00498183	7.48	4.82	2.7	2.41	AC017104.3	chr2	miRNA
ENSG00000231196.3	5.16305	-3.04708	0.00401325	0.0499175	0	0	0.18	0.15	RP11-495P10.8	chr1	lincRNA
ENSG00000272382.1	-1.23644	-0.518409	0.000215302	0.00624222	0.87	0.87	0.52	0.21	CTD-2035E11.4	chr5	lincRNA
ENSG00000196420.7	-1.52267	-1.5189	0.00170196	0.0278536	0.5	0.5	0.27	0.06	S100A5	chr1	protein_coding	S100 calcium binding protein A5
ENSG00000115155.16	5.1632	-3.047	0.00401325	0.0499175	0	0	0	0.03	OTOF	chr2	protein_coding	otoferlin
ENSG00000162723.9	2.31589	-2.32756	0.00276213	0.0388193	0	0.06	0.21	0.15	SLAMF9	chr1	protein_coding	SLAM family member 9
ENSG00000186510.11	-1.42099	-0.262211	4.84018e-06	0.000314982	0.4	0.38	0.17	0.12	CLCNKA	chr1	protein_coding	chloride channel, voltage-sensitive Ka
ENSG00000115705.20	3.85808	-2.32736	4.49147e-05	0.00186129	0.01	0	0.05	0.07	TPO	chr2	protein_coding	thyroid peroxidase
ENSG00000240401.8	3.52239	-2.54983	0.0005556	0.0122999	0	0.01	0.12	0.06	AC012358.8	chr2	antisense
ENSG00000199709.1	3.93132	-2.27697	4.49147e-05	0.00186129	0	0.17	2.04	1.39	RNU4-23P	chr11	snRNA	RNA, U4 small nuclear 23, pseudogene
ENSG00000277840.1	-5.54159	-2.88521	0.000513026	0.0116927	0.4	0.04	0	0	RP11-103B5.4	chr12	sense_intronic
ENSG00000124772.11	1.35433	-0.31518	1.5505e-05	0.000843411	0.1	0.08	0.21	0.25	CPNE5	chr6	protein_coding	copine V
ENSG00000259746.1	-2.20118	-1.61063	0.000142903	0.0045598	0.81	1.73	0.31	0.24	HSPE1P3	chr15	processed_pseudogene	heat shock 10kDa protein 1 pseudogene 3
ENSG00000127863.15	2.47428	-2.22798	0.00093691	0.0183388	0	0.02	0.02	0.08	TNFRSF19	chr13	protein_coding	tumor necrosis factor receptor superfamily, member 19
ENSG00000261889.1	1.38011	-1.02623	0.000950381	0.0184884	0.41	0.16	1.05	0.39	RP11-473M20.16	chr16	lincRNA
ENSG00000187045.16	2.17212	-1.88711	0.000621595	0.0134075	0.01	0.03	0.07	0.09	TMPRSS6	chr22	protein_coding	transmembrane protease, serine 6
ENSG00000204802.3	-1.13702	-0.534227	0.000902319	0.0178536	0.34	0.55	0.22	0.19	RP11-111F5.4	chr9	lincRNA
ENSG00000102003.10	-1.30745	-0.848511	0.000609117	0.0132283	0.15	0.22	0.06	0.09	SYP	chrX	protein_coding	synaptophysin
ENSG00000278071.1	-1.06551	-0.672546	0.00229019	0.033958	1.21	0.59	0.37	0.47	RP11-736N17.10	chr14	lincRNA
ENSG00000237766.2	-2.05119	-1.88541	0.000999637	0.0192111	0.32	0.24	0.06	0.06	GGTA2P	chr12	processed_pseudogene	glycoprotein, alpha-galactosyltransferase 2, pseudogene
ENSG00000234807.5	2.18655	-1.49134	3.28976e-05	0.00147762	0.08	0.1	0.5	0.34	LINC01135	chr1	lincRNA	long intergenic non-protein coding RNA 1135
ENSG00000253764.1	-1.37847	-1.40591	0.00288707	0.0400822	0.45	0.57	0.18	0.21	RP11-439C15.4	chr8	lincRNA
ENSG00000229676.2	-5.25711	-3.04664	0.00401325	0.0499175	0.02	0.03	0	0	ZNF492	chr19	protein_coding	zinc finger protein 492
ENSG00000106278.11	2.84782	-2.37974	0.000788814	0.0161252	0	0	0.01	0.04	PTPRZ1	chr7	protein_coding	protein tyrosine phosphatase, receptor-type, Z polypeptide 1
ENSG00000108786.10	-1.11479	-0.642049	0.00168952	0.0277322	0.12	0.17	0.07	0.06	HSD17B1	chr17	protein_coding	hydroxysteroid (17-beta) dehydrogenase 1
ENSG00000278344.1	-3.37959	-2.74134	0.00356352	0.0467465	0.55	0.34	0.07	0	RP11-18C24.8	chr12	lincRNA
ENSG00000260588.1	2.228	-2.09021	0.00169163	0.0277322	0.05	0.01	0.13	0.15	RP11-930P14.2	chr8	lincRNA
ENSG00000239291.1	-3.10574	-1.92445	1.84065e-05	0.000957473	0.31	0.51	0.06	0.03	RP5-867C24.1	chr17	processed_pseudogene
ENSG00000182175.13	5.56803	-2.81269	0.000513026	0.0116927	0	0	0.01	0.01	RGMA	chr15	protein_coding	repulsive guidance molecule family member a
ENSG00000002079.12	1.44989	2.318	2.87732e-24	5.47804e-21	0.28	0.44	1.05	0.93	MYH16	chr7	unitary_pseudogene	myosin, heavy chain 16 pseudogene
ENSG00000273356.1	-1.67545	-0.486628	5.44622e-07	5.21923e-05	0.65	0.25	0.16	0.11	RP11-804H8.6	chr3	lincRNA
ENSG00000187908.15	1.06553	0.850445	2.83842e-07	3.08212e-05	0.08	0.16	0.24	0.26	DMBT1	chr10	protein_coding	deleted in malignant brain tumors 1
ENSG00000261534.1	-2.27382	-2.17905	0.00169163	0.0277322	0.09	0.04	0.01	0.01	RP11-244O19.1	chr9	sense_overlapping
ENSG00000150076.22	2.48085	-1.46288	3.90577e-06	0.000268127	0.02	0.03	0.12	0.15	CCDC7	chr10	protein_coding	coiled-coil domain containing 7
ENSG00000271576.1	-1.53204	-1.13303	0.000311072	0.00813516	0.36	0.3	0.09	0.14	RP11-486G15.2	chr1	lincRNA
ENSG00000169067.3	1.2448	1.34508	1.2908e-11	4.85034e-09	0.4	0.51	1.06	1.1	ACTBL2	chr5	protein_coding	actin, beta-like 2
ENSG00000250001.1	5.31089	-2.96472	0.00202018	0.0310507	0	0	0.44	0	CTD-2201E9.2	chr5	sense_intronic
ENSG00000143845.14	-1.12808	-0.0122965	3.82646e-05	0.00165319	0.51	0.32	0.13	0.25	ETNK2	chr1	protein_coding	ethanolamine kinase 2
ENSG00000264019.1	-5.2568	-3.04679	0.00401325	0.0499175	0.12	0.36	0	0	RP11-6N17.6	chr17	antisense
ENSG00000215866.7	1.44642	-0.9067	0.000397117	0.00979351	0.11	0.13	0.47	0.19	LINC01356	chr1	lincRNA	long intergenic non-protein coding RNA 1356
ENSG00000213809.8	-5.25863	-3.0459	0.00401325	0.0499175	0.13	0.01	0	0	KLRK1	chr12	protein_coding	killer cell lectin-like receptor subfamily K, member 1
ENSG00000221878.10	1.56976	0.0125939	3.34977e-08	4.95662e-06	0.06	0.14	0.34	0.26	PSG7	chr19	protein_coding	pregnancy specific beta-1-glycoprotein 7 (gene/pseudogene)
ENSG00000254109.5	1.52711	-0.777412	7.84711e-05	0.00288414	0.3	0.16	0.58	0.73	RBPMS-AS1	chr8	antisense	RBPMS antisense RNA 1
ENSG00000184305.14	-1.06654	1.04451	4.65372e-08	6.61199e-06	0.34	0.29	0.17	0.13	CCSER1	chr4	protein_coding	coiled-coil serine-rich protein 1
ENSG00000228084.1	-1.20844	-0.489542	0.00025667	0.00705278	1.14	1.33	0.58	0.48	RP5-884G6.2	chr1	antisense
ENSG00000276368.1	-2.99221	-2.00424	3.26183e-05	0.00147426	0.79	0.81	0.06	0.13	HIST1H2AJ	chr6	protein_coding	histone cluster 1, H2aj
ENSG00000164404.8	-1.00487	-0.365591	0.0019695	0.0309039	0.21	0.3	0.04	0.21	GDF9	chr5	protein_coding	growth differentiation factor 9
ENSG00000128045.6	5.78613	-2.67522	0.000130667	0.00427936	0	0	0.05	0.12	RASL11B	chr4	protein_coding	RAS-like, family 11, member B
ENSG00000237810.3	-2.34623	-2.13361	0.00100954	0.0192466	0.19	0.17	0.07	0	CTD-2571E19.3	chr8	processed_pseudogene
ENSG00000166923.10	2.54648	-2.18052	0.00093691	0.0183388	0	0	0.02	0.01	GREM1	chr15	protein_coding	gremlin 1, DAN family BMP antagonist
ENSG00000131885.16	-5.40641	-2.96362	0.00202018	0.0310507	0.13	0.05	0	0	KRT17P1	chr17	transcribed_unprocessed_pseudogene	keratin 17 pseudogene 1
ENSG00000205890.3	2.92901	-2.32734	0.000440582	0.0104851	0.01	0.01	0.05	0.1	RP11-473M20.5	chr16	antisense
ENSG00000277210.3	-2.50012	-2.32668	0.00276213	0.0388193	0.08	0.12	0.02	0.01	RP11-14C10.4	chr15	lincRNA
ENSG00000183844.16	1.95864	-1.49131	0.000140526	0.00450916	0.06	0.09	0.33	0.3	FAM3B	chr21	protein_coding	family with sequence similarity 3, member B
ENSG00000169876.13	4.00054	-2.22793	2.38421e-05	0.0011639	0	0	0.02	0.02	MUC17	chr7	protein_coding	mucin 17, cell surface associated
ENSG00000137558.7	5.68113	-2.74235	0.000258817	0.00705278	0	0	0.02	0.02	PI15	chr8	protein_coding	peptidase inhibitor 15
ENSG00000147689.16	1.15875	6.44195	9.55472e-43	3.89805e-39	6.76	9.73	18.49	18.18	FAM83A	chr8	protein_coding	family with sequence similarity 83, member A
ENSG00000275215.1	-5.25619	-3.04708	0.00401325	0.0499175	0	1.43	0	0	RNA5-8S5	chr21	rRNA	RNA, 5.8S ribosomal 5
ENSG00000260685.1	5.16303	-3.04709	0.00401325	0.0499175	0	0	0.21	0.11	RP11-326L17.1	chr15	processed_pseudogene
ENSG00000105427.9	-1.97174	-1.6089	0.000355844	0.00905721	0.97	0.36	0.2	0.12	CNFN	chr19	protein_coding	cornifelin
ENSG00000282418.1	3.00544	-2.2767	0.000440582	0.0104851	0.1	0	0.55	0.26	RP11-496N12.9	chr1	lincRNA
ENSG00000250697.1	1.31072	-0.394345	4.92733e-05	0.00201309	0.38	0.48	1.14	0.99	CTD-2066L21.3	chr5	lincRNA
ENSG00000278963.1	-1.73445	-1.17891	7.19933e-05	0.00270169	0.26	0.24	0.06	0.09	RP11-294J22.7	chr17	TEC
ENSG00000272677.1	-1.42293	-1.37866	0.00195707	0.0307764	0.46	0.48	0.11	0.24	RP11-127B20.3	chr4	antisense
ENSG00000205622.9	1.60172	-1.46239	0.00224652	0.0334844	0.02	0.01	0.07	0.04	AF064858.6	chr21	lincRNA
ENSG00000188266.13	-1.20289	0.269371	2.15023e-06	0.00016507	0.31	0.26	0.08	0.17	HYKK	chr15	protein_coding	hydroxylysine kinase
ENSG00000142920.16	-1.02704	-0.352507	0.00112743	0.0207723	0.3	0.41	0.2	0.15	AZIN2	chr1	protein_coding	antizyme inhibitor 2
ENSG00000162878.12	-1.19553	-0.366689	0.000224465	0.00641385	0.21	0.48	0.22	0.09	PKDCC	chr2	protein_coding	protein kinase domain containing, cytoplasmic
ENSG00000236658.1	1.68077	-1.67559	0.00214025	0.0323907	0.18	0.26	0.93	0.53	RP11-83J21.3	chr9	antisense
ENSG00000128564.6	1.30827	1.11059	3.8725e-11	1.21529e-08	0.41	0.37	0.89	1.02	VGF	chr7	protein_coding	VGF nerve growth factor inducible
ENSG00000105289.14	-1.30181	0.360993	1.21331e-07	1.49352e-05	0.5	0.37	0.21	0.14	TJP3	chr19	protein_coding	tight junction protein 3
ENSG00000251095.6	-1.22201	4.35052	2.0675e-35	6.5604e-32	6.11	3.79	2.13	2.08	RP11-115D19.1	chr4	antisense
ENSG00000273179.1	-2.1088	-1.84828	0.000617813	0.0133764	0.77	0.86	0.24	0.12	RP11-20I20.4	chr4	antisense
ENSG00000230484.2	-3.2574	-2.8114	0.00356352	0.0467465	0.27	0.05	0.03	0	OR51A10P	chr11	unitary_pseudogene	olfactory receptor, family 51, subfamily A, member 10 pseudogene
ENSG00000258082.1	5.78602	-2.67528	0.000130667	0.00427936	0	0	0.23	0.17	RP11-443B7.3	chr1	lincRNA
ENSG00000237628.2	-5.25619	-3.04708	0.00401325	0.0499175	0	0.37	0	0	RP11-522L3.4	chrX	processed_pseudogene
ENSG00000251913.1	-1.81865	-1.70734	0.00137881	0.0242314	3.2	3.5	0.23	1.64	RNU6-513P	chr22	snRNA	RNA, U6 small nuclear 513, pseudogene
ENSG00000279369.1	5.44508	-2.88675	0.00101766	0.0192466	0	0	0.14	0	RP11-51F16.1	chr17	TEC
ENSG00000225039.1	-1.12326	-0.962726	0.00329867	0.044331	1.61	0.92	0.74	0.38	LINC01058	chr13	lincRNA	long intergenic non-protein coding RNA 1058
ENSG00000273485.1	-1.35984	-1.32672	0.0024903	0.0362199	0.51	0.81	0.25	0.26	RP11-225H22.7	chr10	antisense
ENSG00000268001.1	1.34259	0.542267	1.07011e-08	1.87485e-06	0.28	0.41	0.75	1.01	CARD8-AS1	chr19	antisense	CARD8 antisense RNA 1
ENSG00000107593.16	5.16308	-3.04706	0.00401325	0.0499175	0	0	0.03	0.04	PKD2L1	chr10	protein_coding	polycystic kidney disease 2-like 1
ENSG00000243389.1	-3.3799	-2.74119	0.00356352	0.0467465	0.52	0.23	0.06	0	AC012442.5	chr2	3prime_overlapping_ncrna
ENSG00000160224.16	-5.2565	-3.04693	0.00401325	0.0499175	0.01	0.09	0	0	AIRE	chr21	protein_coding	autoimmune regulator
ENSG00000216316.1	3.20669	-2.74231	0.00356352	0.0467465	0	0.04	0.16	0.33	RP3-354N19.3	chr6	processed_pseudogene
ENSG00000253408.5	5.44522	-2.88668	0.00101766	0.0192466	0	0	0.11	0.09	RP11-231D20.2	chr8	antisense
ENSG00000105784.15	-1.01658	1.11238	1.12928e-07	1.39611e-05	0.64	0.58	0.32	0.28	RUNDC3B	chr7	protein_coding	RUN domain containing 3B
ENSG00000010295.19	2.34275	-1.38074	4.40489e-06	0.000291867	0	0.04	0.08	0.15	IFFO1	chr12	protein_coding	intermediate filament family orphan 1
ENSG00000261655.1	-1.47445	-1.5484	0.00256869	0.0370249	0.21	0.17	0.05	0.09	CTD-3064M3.3	chr8	sense_overlapping
ENSG00000146859.6	2.73835	-1.74294	1.36694e-05	0.000756533	0	0.05	0.12	0.24	TMEM140	chr7	protein_coding	transmembrane protein 140
ENSG00000100351.16	5.16311	-3.04705	0.00401325	0.0499175	0	0	0.02	0.03	GRAP2	chr22	protein_coding	GRB2-related adaptor protein 2
ENSG00000138759.17	1.7429	-1.25249	0.000257592	0.00705278	0.01	0.01	0.04	0.01	FRAS1	chr4	protein_coding	Fraser extracellular matrix complex subunit 1
ENSG00000145757.15	5.31101	-2.96466	0.00202018	0.0310507	0	0	0.13	0.09	SPATA9	chr5	protein_coding	spermatogenesis associated 9
ENSG00000259881.1	-1.08033	0.216805	2.52584e-05	0.00121232	0.56	0.48	0.21	0.27	RP11-830F9.5	chr16	antisense
ENSG00000272183.1	-5.25772	-3.04634	0.00401325	0.0499175	0.21	0.15	0	0	RP11-523H20.3	chr2	antisense
ENSG00000235070.3	1.36955	-0.354169	1.7626e-05	0.000933885	0.29	0.32	0.5	1.09	AC068138.1	chr2	lincRNA
ENSG00000071246.10	-1.80307	-1.57983	0.00124924	0.0223533	0.04	0.09	0.03	0	VASH1	chr14	protein_coding	vasohibin 1
ENSG00000239627.3	5.163	-3.04711	0.00401325	0.0499175	0	0	0.35	0.1	RP11-124A7.1	chr4	processed_pseudogene
ENSG00000273366.1	2.31583	-2.32759	0.00276213	0.0388193	0	0.11	0.43	0.18	CTA-989H11.1	chr22	lincRNA
ENSG00000147231.13	4.0007	-2.22816	2.38421e-05	0.0011639	0	0.01	0.1	0.02	CXorf57	chrX	protein_coding	chromosome X open reading frame 57
ENSG00000179168.14	-2.71839	-1.88658	7.0724e-05	0.00267161	0.06	0.23	0.02	0.02	GGN	chr19	protein_coding	gametogenetin
ENSG00000240991.3	5.16314	-3.04703	0.00401325	0.0499175	0	0	0.1	0.36	RPL23AP67	chr12	processed_pseudogene	ribosomal protein L23a pseudogene 67
ENSG00000271978.1	-1.18391	-0.417027	0.00019038	0.00568116	0.36	0.17	0.09	0.13	RP11-428J1.4	chr6	lincRNA
ENSG00000214940.8	2.05839	-1.58014	0.000142903	0.0045598	0.07	0.05	0.06	0.43	NPIPA8	chr16	protein_coding	nuclear pore complex interacting protein family, member A8
ENSG00000196611.4	1.1992	0.0231292	1.30935e-05	0.000728897	0.17	0.33	0.63	0.54	MMP1	chr11	protein_coding	matrix metallopeptidase 1
ENSG00000258410.1	1.69039	-1.18086	0.000232321	0.00656244	0.29	0.25	0.75	1.02	RP11-173D3.1	chr15	lincRNA
ENSG00000242058.2	2.47742	-1.92583	0.000207675	0.00606817	0	0.13	0.65	0.17	RPS4XP19	chr18	processed_pseudogene	ribosomal protein S4X pseudogene 19
ENSG00000278771.1	-1.62692	-1.25001	0.000257592	0.00705278	2.13	1.22	0.8	0.24	Metazoa_SRP	chr14	misc_RNA
ENSG00000237243.1	5.31098	-2.96467	0.00202018	0.0310507	0	0	0.29	0.13	AC022173.2	chr7	antisense
ENSG00000273585.1	-3.26182	-1.81194	3.25511e-06	0.000230669	0.57	0.94	0.15	0	RP11-14C10.5	chr15	lincRNA
ENSG00000141854.7	-1.34904	-0.885263	0.000495156	0.0114222	0.4	0.38	0.18	0.12	CTB-55O6.8	chr19	protein_coding
ENSG00000242221.8	2.80833	-1.43505	3.69113e-07	3.80546e-05	0.02	0.06	0.29	0.32	PSG2	chr19	protein_coding	pregnancy specific beta-1-glycoprotein 2
ENSG00000223198.1	-2.47082	-1.81117	8.00124e-05	0.00292948	1.96	1.37	0.11	0.46	RNU2-22P	chr2	snRNA	RNA, U2 small nuclear 22, pseudogene
ENSG00000198729.4	1.07292	-0.367497	0.000649139	0.0139175	0.15	0.21	0.38	0.41	PPP1R14C	chr6	protein_coding	protein phosphatase 1, regulatory (inhibitor) subunit 14C
ENSG00000260452.1	2.15841	-2.13461	0.00281675	0.0393739	0.18	0.05	0.6	0.41	TPRKBP2	chr16	processed_pseudogene	TP53RK binding protein pseudogene 2
ENSG00000196189.12	1.9146	-1.38044	8.54601e-05	0.00308542	0.02	0.04	0.15	0.1	SEMA4A	chr1	protein_coding	sema domain, immunoglobulin domain (Ig), transmembrane domain (TM) and short cytoplasmic domain, (semaphorin) 4A
ENSG00000185955.4	1.24449	-0.169611	3.57631e-05	0.00156907	0.47	0.39	0.85	1.16	C7orf61	chr7	protein_coding	chromosome 7 open reading frame 61
ENSG00000224324.1	5.44508	-2.88675	0.00101766	0.0192466	0	0	1	0	THAP5P1	chr7	processed_pseudogene	THAP domain containing 5 pseudogene 1
ENSG00000260388.2	-1.50368	-0.722055	3.26578e-05	0.00147426	0.42	0.19	0.08	0.13	LINC00562	chr13	lincRNA	long intergenic non-protein coding RNA 562
ENSG00000259920.1	-5.66257	-2.81213	0.000513026	0.0116927	0.04	0.07	0	0	RP11-2E11.5	chr7	lincRNA
ENSG00000149571.10	2.92914	-2.32758	0.000440582	0.0104851	0	0.01	0.07	0.03	KIRREL3	chr11	protein_coding	kin of IRRE like 3 (Drosophila)
ENSG00000251023.1	-1.34007	-0.314949	2.68275e-05	0.00127266	0.15	0.44	0.09	0.15	RP11-549J18.1	chr5	sense_intronic
ENSG00000164841.4	-5.25802	-3.0462	0.00401325	0.0499175	0.1	0.04	0	0	TMEM74	chr8	protein_coding	transmembrane protein 74
ENSG00000149658.17	-1.71677	7.28809	6.11885e-93	5.82474e-89	55.78	71.85	19.4	19.21	YTHDF1	chr20	protein_coding	YTH N(6)-methyladenosine RNA binding protein 1
ENSG00000144218.18	1.70713	-1.52085	0.000809428	0.0163644	0	0.02	0.06	0.01	AFF3	chr2	protein_coding	AF4/FMR2 family, member 3
ENSG00000174502.18	3.31947	-2.67511	0.00192477	0.0304867	0.01	0	0.03	0.04	SLC26A9	chr1	protein_coding	solute carrier family 26 (anion exchanger), member 9
ENSG00000271992.1	-2.1982	-2.22576	0.00281675	0.0393739	0.95	0.1	0.15	0.05	RP11-42O15.3	chr1	lincRNA
ENSG00000253893.2	-3.52347	-2.04487	6.8202e-06	0.000415191	0.67	0.15	0.03	0.03	FAM85B	chr8	antisense	family with sequence similarity 85, member B
ENSG00000120217.13	1.08538	0.584786	2.50024e-06	0.000188396	0.22	0.22	0.44	0.48	CD274	chr9	protein_coding	CD274 molecule
ENSG00000169213.6	1.0187	0.726979	2.48317e-06	0.000187604	0.06	0.08	0.16	0.13	RAB3B	chr1	protein_coding	RAB3B, member RAS oncogene family
ENSG00000166341.7	2.76143	-2.4343	0.00140599	0.0244384	0	0	0.03	0.01	DCHS1	chr11	protein_coding	dachsous cadherin-related 1
ENSG00000175920.15	1.14106	0.298758	7.10449e-06	0.000428943	0.28	0.22	0.68	0.41	DOK7	chr4	protein_coding	docking protein 7
ENSG00000234479.2	-5.40733	-2.96318	0.00101766	0.0192466	0.34	0	0	0	AP1B1P1	chr22	transcribed_unprocessed_pseudogene	adaptor-related protein complex 1, beta 1 subunit pseudogene 1
ENSG00000263335.1	-1.61331	-1.46198	0.00112082	0.0206773	0.3	0.67	0.26	0.06	AF001548.5	chr16	antisense
ENSG00000277170.1	-2.10967	-1.84783	0.000617813	0.0133764	0.81	0.56	0.15	0.15	RP11-295D4.4	chr16	sense_intronic
ENSG00000163590.13	-1.15343	-0.944111	0.00329867	0.044331	0.04	0.05	0.02	0.02	PPM1L	chr3	protein_coding	protein phosphatase, Mg2+/Mn2+ dependent, 1L
ENSG00000260896.5	-1.86473	-0.674143	4.79321e-07	4.73649e-05	0.27	0.39	0.1	0.08	PRCAT47	chr16	lincRNA
ENSG00000155093.17	-6.52325	-2.22721	5.66181e-07	5.38967e-05	0.03	0.08	0	0	PTPRN2	chr7	protein_coding	protein tyrosine phosphatase, receptor type, N polypeptide 2
ENSG00000107165.12	-5.25772	-3.04634	0.00401325	0.0499175	0.05	0.03	0	0	TYRP1	chr9	protein_coding	tyrosinase-related protein 1
ENSG00000227986.1	-1.11589	-0.741786	0.00234173	0.0345786	0.6	0.97	0.32	0.41	TRIM60P18	chr7	unprocessed_pseudogene	tripartite motif containing 60 pseudogene 18
ENSG00000136167.13	1.19223	-0.0182902	2.04564e-05	0.00103764	0.05	0.19	0.27	0.29	LCP1	chr13	protein_coding	lymphocyte cytosolic protein 1 (L-plastin)
ENSG00000247809.7	-1.17402	-0.0466666	2.78028e-05	0.00130376	0.17	0.29	0.06	0.14	NR2F2-AS1	chr15	antisense	NR2F2 antisense RNA 1
ENSG00000231995.2	-2.10307	-1.13332	1.97969e-06	0.000154893	0.88	1.05	0.16	0.28	RP11-111F5.2	chr9	processed_pseudogene
ENSG00000180777.13	3.61404	-2.49093	0.000297218	0.00788111	0	0.01	0.04	0.04	ANKRD30B	chr18	protein_coding	ankyrin repeat domain 30B
ENSG00000115008.5	1.50467	-1.02695	0.00035791	0.0090855	0.08	0.1	0.38	0.14	IL1A	chr2	protein_coding	interleukin 1, alpha
ENSG00000274561.1	-1.16527	0.18974	6.8331e-06	0.000415191	3.11	2.88	1.5	1.14	RP11-147L13.12	chr17	lincRNA
ENSG00000231512.5	-5.2568	-3.04679	0.00401325	0.0499175	0.04	0.14	0	0	LINC01347	chr1	lincRNA	long intergenic non-protein coding RNA 1347
ENSG00000166670.9	1.78687	-0.832084	9.79849e-06	0.000569909	0.09	0.12	0.61	0.15	MMP10	chr11	protein_coding	matrix metallopeptidase 10
ENSG00000161298.16	-1.03874	-0.640858	0.00261981	0.0375586	0.08	0.06	0.02	0.04	ZNF382	chr19	protein_coding	zinc finger protein 382
ENSG00000229425.1	-3.48911	-1.64201	9.63331e-08	1.22816e-05	0.31	0.56	0.02	0.05	AJ006998.2	chr21	lincRNA
ENSG00000277687.1	-1.0126	-0.216036	0.000702928	0.0147713	0.5	1.09	0.45	0.35	RP11-427L15.2	chr10	sense_intronic
ENSG00000184601.10	-1.47525	-1.54821	0.00256869	0.0370249	0.16	0.1	0.09	0	C14orf180	chr14	protein_coding	chromosome 14 open reading frame 180
ENSG00000254842.6	1.60309	-0.726322	2.48266e-05	0.0011936	0.09	0.12	0.36	0.29	RP11-890B15.2	chr11	lincRNA
ENSG00000279692.1	-1.77584	-1.88587	0.00369315	0.0477884	0.18	0.21	0.08	0.03	RP11-1055B8.1	chr17	TEC
ENSG00000272071.1	-1.66752	-0.962569	2.43639e-05	0.0011813	1.38	0.94	0.44	0.27	RP11-332J15.4	chr5	lincRNA
ENSG00000260190.1	1.53262	-0.925961	0.000146591	0.00465149	0.24	0.27	0.9	0.56	RP11-229P13.25	chr9	sense_overlapping
ENSG00000279720.1	-1.02779	1.01976	1.59984e-07	1.85724e-05	5.32	4.12	2.04	2.52	bP-2171C21.6	chr21	processed_pseudogene
ENSG00000162746.14	2.19549	-1.18184	1.89248e-06	0.000149296	0.01	0.1	0.46	0.09	FCRLB	chr1	protein_coding	Fc receptor-like B
ENSG00000146950.12	1.58424	-1.25257	0.000778714	0.016022	0.02	0.02	0.08	0.05	SHROOM2	chrX	protein_coding	shroom family member 2
ENSG00000188263.10	-1.56923	-1.10948	0.000138924	0.00447281	0.23	0.08	0.07	0.03	IL17REL	chr22	protein_coding	interleukin 17 receptor E-like
ENSG00000279048.1	-1.19235	-0.982949	0.00199799	0.0310507	0.29	0.18	0.09	0.11	RP11-511H23.2	chr7	TEC
ENSG00000215097.3	2.17117	-1.88669	0.000621595	0.0134075	0.06	0.01	0.16	0.18	DUSP8P3	chr10	processed_pseudogene	dual specificity phosphatase 8 pseudogene 3
ENSG00000279900.1	-1.03847	-0.594597	0.00297756	0.040901	1.35	1.82	0.42	1.13	RP11-113K21.6	chr11	TEC
ENSG00000165548.10	3.31986	-2.67521	0.00192477	0.0304867	0	0	0.01	0.05	TMEM63C	chr14	protein_coding	transmembrane protein 63C
ENSG00000123329.17	2.74606	-2.04748	0.000178015	0.00541399	0.01	0.01	0.08	0.07	ARHGAP9	chr12	protein_coding	Rho GTPase activating protein 9
ENSG00000279422.1	1.70498	-1.81284	0.00369315	0.0477884	0.28	0.18	1.08	0.43	RP11-641J8.1	chrX	TEC
ENSG00000226496.2	2.26308	-0.477387	5.65186e-10	1.34505e-07	0.1	0.06	0.21	0.57	LINC00323	chr21	antisense	long intergenic non-protein coding RNA 323
ENSG00000137261.13	1.27694	-0.945668	0.00141991	0.0245642	0.02	0.04	0.09	0.07	KIAA0319	chr6	protein_coding	KIAA0319
ENSG00000233392.5	-1.14293	-0.72524	0.00171278	0.0279825	0.18	0.39	0.17	0.1	AC104809.4	chr2	processed_transcript
ENSG00000261092.1	1.96834	-0.98529	4.91829e-06	0.000318495	0.52	0.23	1.23	1.66	RP11-21B23.2	chr16	lincRNA
ENSG00000223476.1	-3.02779	-2.37971	0.000788814	0.0161252	0.16	1.06	0.14	0	VN1R42P	chr7	processed_pseudogene	vomeronasal 1 receptor 42 pseudogene
ENSG00000268279.4	3.6141	-2.4909	0.000297218	0.00788111	0	0.04	0.22	0.37	RP11-434D12.1	chr3	protein_coding
ENSG00000196092.12	-1.62807	-1.15657	0.000153786	0.0048475	0.05	0.07	0.01	0.03	PAX5	chr9	protein_coding	paired box 5
ENSG00000186517.13	1.41373	-0.229322	3.4097e-06	0.00024043	0.06	0.1	0.19	0.26	ARHGAP30	chr1	protein_coding	Rho GTPase activating protein 30
ENSG00000270393.1	2.39686	-2.27681	0.00276213	0.0388193	0.03	0.06	0.27	0.22	AC000095.9	chr22	processed_pseudogene
ENSG00000198286.9	2.47768	-1.9257	0.000207675	0.00606817	0	0.02	0.06	0.08	CARD11	chr7	protein_coding	caspase recruitment domain family, member 11
ENSG00000257607.1	1.4101	-1.09136	0.000598713	0.0130188	0.02	0.22	0.14	0.53	RP11-449P15.1	chr7	antisense
ENSG00000260495.1	-5.54007	-2.88595	0.00101766	0.0192466	0.05	0.05	0	0	RP11-55K13.1	chr16	antisense
ENSG00000257605.2	1.24511	-0.965147	0.00199799	0.0310507	0.39	0.34	1.07	0.64	RP11-680A11.5	chr12	antisense
ENSG00000241418.1	-2.58192	-2.2758	0.00161345	0.0269141	0.43	0.47	0.09	0.05	FAM195CP	chrX	processed_pseudogene	family with sequence similarity 195, member C, pseudogene
ENSG00000206192.7	1.24725	-1.11223	0.0038841	0.0496295	0.09	0.05	0.15	0.18	ANKRD20A9P	chr13	unprocessed_pseudogene	ankyrin repeat domain 20 family, member A9, pseudogene
ENSG00000247728.2	1.50111	-0.795149	0.000114331	0.00385942	0.31	0.18	0.71	0.65	RP11-932O9.7	chr15	antisense
ENSG00000184486.8	-1.06825	-0.365783	0.0009937	0.0191356	0.14	0.21	0.09	0.07	POU3F2	chr6	protein_coding	POU class 3 homeobox 2
ENSG00000278637.1	-3.59824	-2.60987	0.00103577	0.0194858	0.8	0.39	0.08	0	HIST1H4A	chr6	protein_coding	histone cluster 1, H4a
ENSG00000134007.3	3.20623	-2.74224	0.00356352	0.0467465	0.01	0	0.08	0.03	ADAM20	chr14	protein_coding	ADAM metallopeptidase domain 20
ENSG00000154556.17	-1.34778	1.31891	2.10851e-13	1.09481e-10	0.4	0.3	0.17	0.1	SORBS2	chr4	protein_coding	sorbin and SH3 domain containing 2
ENSG00000248377.1	1.68733	-1.40746	0.000477878	0.0111863	0.19	0.65	1.36	1.47	HMGN1P9	chr3	processed_pseudogene	high mobility group nucleosome binding domain 1 pseudogene
ENSG00000239827.8	-1.73764	-1.27575	0.000119631	0.00398278	0.25	0.34	0.1	0.07	SUGT1P3	chr13	transcribed_unprocessed_pseudogene	SUGT1 pseudogene 3
ENSG00000185437.13	1.11872	-0.676372	0.00198807	0.0310507	0.13	0.28	0.5	0.41	SH3BGR	chr21	protein_coding	SH3 domain binding glutamate-rich protein
ENSG00000144278.14	-1.673	-0.324778	1.97983e-07	2.22599e-05	0.19	0.17	0.06	0.05	GALNT13	chr2	protein_coding	polypeptide N-acetylgalactosaminyltransferase 13
ENSG00000143119.12	1.06851	0.332481	2.16506e-05	0.00108268	0.53	0.37	0.62	1.26	CD53	chr1	protein_coding	CD53 molecule
ENSG00000236456.1	5.31089	-2.96472	0.00202018	0.0310507	0	0	0.41	0	RP4-785G19.2	chr20	processed_pseudogene
ENSG00000214093.3	5.44528	-2.88665	0.00101766	0.0192466	0	0	0.21	0.37	RP11-247I13.3	chr22	processed_pseudogene
ENSG00000145362.16	-1.71193	-1.77455	0.00330053	0.0443351	0.04	0	0	0.01	ANK2	chr4	protein_coding	ankyrin 2, neuronal
ENSG00000279932.1	3.2062	-2.74226	0.00356352	0.0467465	0.04	0	0.35	0.07	RP11-349F21.2	chr8	sense_intronic
ENSG00000233892.1	-1.35365	-1.08922	0.00110105	0.0203916	0.42	0.46	0.26	0.08	PAIP1P1	chr6	processed_pseudogene	poly(A) binding protein interacting protein 1 pseudogene 1
ENSG00000165269.12	-1.83564	-1.43303	0.000309577	0.00813331	0.11	0.12	0.01	0.05	AQP7	chr9	protein_coding	aquaporin 7
ENSG00000259582.3	3.31975	-2.67527	0.00192477	0.0304867	0	0.01	0.09	0.08	RP11-461F11.3	chr15	lincRNA
ENSG00000259663.2	1.91979	-1.84935	0.00160785	0.026852	0.01	0.01	0.03	0.05	CTD-2314G24.2	chr5	antisense
ENSG00000186897.4	-1.32505	-0.461018	5.64937e-05	0.00224388	0.36	0.46	0.16	0.16	C1QL4	chr12	protein_coding	complement component 1, q subcomponent-like 4
ENSG00000272760.1	-2.49916	-2.32709	0.00276213	0.0388193	0.09	0.35	0	0.08	RP11-5C23.1	chr7	antisense
ENSG00000225535.6	-5.25711	-3.04664	0.00401325	0.0499175	0.06	0.11	0	0	LINC01393	chr7	lincRNA	long intergenic non-protein coding RNA 1393
ENSG00000272720.1	1.01732	-0.491812	0.00214524	0.0324318	0.19	0.32	0.48	0.58	CTA-228A9.3	chr22	lincRNA
ENSG00000251127.2	1.58657	-0.253585	3.62177e-07	3.74748e-05	0.1	0.14	0.36	0.37	RP11-280G9.1	chr8	lincRNA
ENSG00000203804.4	1.47722	-0.743692	0.000100677	0.00352346	0.13	0.33	0.8	0.52	ADAMTSL4-AS1	chr1	processed_transcript	ADAMTSL4 antisense RNA 1
ENSG00000237330.2	1.02069	2.30277	2.08583e-13	1.09481e-10	1.05	1.86	2.74	3.22	RNF223	chr1	protein_coding	ring finger protein 223
ENSG00000228742.9	-1.6999	-1.20213	0.000110591	0.00377781	0.17	0.12	0.07	0.02	RP5-884M6.1	chr7	lincRNA
ENSG00000215196.4	-1.00237	2.26869	9.25505e-13	4.12978e-10	2.02	1.81	1.04	0.85	AC091878.1	chr5	antisense
ENSG00000248884.1	5.16305	-3.04708	0.00401325	0.0499175	0	0	0.29	0.24	CTC-537E7.3	chr5	lincRNA
ENSG00000242798.1	-1.14183	0.0277055	2.46559e-05	0.0011883	2.23	1.91	1	0.85	RP11-506M12.1	chr7	antisense
ENSG00000006837.11	-2.07257	-1.04601	1.26625e-06	0.000106046	0.2	0.27	0.05	0.06	CDKL3	chr5	protein_coding	cyclin-dependent kinase-like 3
ENSG00000255079.1	3.20671	-2.7423	0.00356352	0.0467465	0	0.03	0.09	0.28	RP11-45A12.1	chr11	lincRNA
ENSG00000156414.18	1.7886	-1.11286	6.65256e-05	0.0025365	0.04	0.03	0.17	0.05	TDRD9	chr14	protein_coding	tudor domain containing 9
ENSG00000255710.2	-2.73353	-2.17877	0.000311058	0.00813516	0.38	0.14	0.05	0.02	RP11-667M19.9	chr11	processed_pseudogene
ENSG00000274270.1	-3.74058	-1.88586	1.10508e-06	9.47718e-05	0.1	0.16	0.01	0.01	RP11-34F20.7	chr13	sense_intronic
ENSG00000058085.14	1.29509	2.56816	2.72078e-22	4.57059e-19	0.35	0.62	1.14	1.25	LAMC2	chr1	protein_coding	laminin, gamma 2
ENSG00000254620.1	-5.88	-2.67499	0.000130667	0.00427936	0.11	0.57	0	0	RP5-907D15.3	chr20	lincRNA
ENSG00000270090.5	-2.5452	-2.00443	0.000207675	0.00606817	0.3	0.34	0.1	0	RP11-529E10.7	chr4	lincRNA
ENSG00000271204.1	-5.25711	-3.04664	0.00401325	0.0499175	0.04	0.07	0	0	RP11-138A9.1	chr7	lincRNA
ENSG00000279851.2	-1.75148	-1.48841	0.000733862	0.0152864	0.33	0.11	0.04	0.09	CH507-216K13.2	chr21	lincRNA
ENSG00000065923.9	-1.09505	0.0876593	3.87332e-05	0.00166588	0.14	0.1	0.05	0.06	SLC9A7	chrX	protein_coding	solute carrier family 9, subfamily A (NHE7, cation proton antiporter 7), member 7
ENSG00000169026.12	-2.4833	-2.04544	0.000353561	0.00901517	0.19	0.08	0.01	0.03	MFSD7	chr4	protein_coding	major facilitator superfamily domain containing 7
ENSG00000254656.1	5.56801	-2.8127	0.000513026	0.0116927	0	0	0.03	0.03	RTL1	chr14	protein_coding	retrotransposon-like 1
ENSG00000181444.12	-2.0162	-1.57908	0.000224158	0.00641385	0.13	0.16	0.05	0.02	ZNF467	chr7	protein_coding	zinc finger protein 467
ENSG00000280047.1	1.46654	-1.55035	0.00385185	0.0492837	0.02	0.07	0.18	0.09	CTC-463A16.1	chr5	TEC
ENSG00000279716.1	5.16311	-3.04705	0.00401325	0.0499175	0	0	0.04	0.09	AC006128.2	chr19	TEC
ENSG00000037280.15	1.86752	-1.70888	0.000948794	0.018477	0.01	0.02	0.07	0.04	FLT4	chr5	protein_coding	fms-related tyrosine kinase 4
ENSG00000226816.2	-3.37747	-2.74237	0.00356352	0.0467465	0	0.14	0.01	0	AC005082.12	chr7	lincRNA
ENSG00000259736.1	-1.5367	-1.40533	0.000998081	0.0191941	0.49	0.41	0.12	0.18	CRTC3-AS1	chr15	antisense	CRTC3 antisense RNA 1
ENSG00000275773.1	-2.85167	-2.48993	0.00249347	0.0362199	0.62	0.62	0.08	0.08	RP11-343D24.2	chr6	lincRNA
ENSG00000278597.1	-3.45238	-1.6715	9.63331e-08	1.22816e-05	17.55	0.99	0.49	0.99	FP671120.7	chr21	miRNA
ENSG00000005187.11	-1.32698	0.430487	3.78428e-08	5.4538e-06	0.55	0.54	0.23	0.2	ACSM3	chr16	protein_coding	acyl-CoA synthetase medium-chain family member 3
ENSG00000228065.10	-1.18082	-0.11055	3.68645e-05	0.0016024	0.41	0.45	0.16	0.22	LINC01515	chr10	lincRNA	long intergenic non-protein coding RNA 1515
ENSG00000230454.1	-1.18272	-0.109576	2.70264e-05	0.00127573	0.47	0.36	0.15	0.21	U73166.2	chr3	lincRNA
ENSG00000175170.14	1.08207	-0.124949	0.000192699	0.00573838	0.21	0.35	0.62	0.58	FAM182B	chr20	protein_coding	family with sequence similarity 182, member B
ENSG00000224411.3	1.1457	-0.0792457	9.24453e-05	0.0032755	0.32	0.13	0.4	0.56	HSP90AA2P	chr11	processed_pseudogene	heat shock protein 90kDa alpha (cytosolic), class A member 2, pseudogene
ENSG00000180287.16	-5.97928	-2.61016	6.60175e-05	0.00252049	0.02	0.02	0	0	PLD5	chr1	protein_coding	phospholipase D family, member 5
ENSG00000260233.3	-1.73791	-1.27559	0.000119631	0.00398278	0.72	0.87	0.23	0.24	SSSCA1-AS1	chr11	processed_transcript	SSSCA1 antisense RNA 1 (head to head)
ENSG00000128886.11	-1.44222	0.287803	1.23061e-08	2.1171e-06	0.8	0.51	0.2	0.27	ELL3	chr15	protein_coding	elongation factor RNA polymerase II-like 3
ENSG00000117407.16	-1.1131	0.183172	1.42876e-05	0.000783859	0.75	0.32	0.26	0.22	ARTN	chr1	protein_coding	artemin
ENSG00000271996.1	-1.12739	0.108117	1.62064e-05	0.000873247	3	1.51	0.76	1.25	RP11-337N6.1	chr2	antisense
ENSG00000276077.4	2.4015	-1.5207	1.10805e-05	0.000636693	0.01	0.04	0.16	0.15	CH507-254M2.2	chr21	lincRNA
ENSG00000271989.1	5.44508	-2.88675	0.00101766	0.0192466	0	0	0.33	0	RP4-736L20.3	chr1	antisense
ENSG00000278962.1	-1.02043	0.125136	0.000101269	0.00353981	0.59	0.5	0.31	0.21	RP11-399B17.1	chr2	TEC
ENSG00000246323.2	-2.49891	-2.32727	0.00276213	0.0388193	0.04	0.29	0.04	0.02	RP11-325L7.1	chr5	antisense
ENSG00000237289.9	-2.53848	-1.06609	1.03735e-08	1.85154e-06	0.39	0.27	0.07	0.04	CKMT1B	chr15	protein_coding	creatine kinase, mitochondrial 1B
ENSG00000148677.6	2.677	0.595715	1.96008e-24	3.99828e-21	0.1	0.23	0.88	1.3	ANKRD1	chr10	protein_coding	ankyrin repeat domain 1 (cardiac muscle)
ENSG00000229261.1	1.21492	-0.849569	0.00145235	0.0248457	0.14	0.13	0.26	0.36	RP11-227H15.4	chr10	antisense
ENSG00000273211.1	-2.04211	-2.08905	0.00273373	0.0387251	0.64	0.46	0.05	0.2	RP13-131K19.7	chr3	lincRNA
ENSG00000231880.2	1.56597	-1.61147	0.00292185	0.0404275	0.15	0.26	0.65	0.62	RP11-76I23.7	chr11	antisense
ENSG00000278998.1	-1.5916	-1.18018	0.000232321	0.00656244	0.32	0.74	0.1	0.26	RP11-1430O6.1	chr7	TEC
ENSG00000204389.9	1.83138	7.41195	5.61752e-105	8.02125e-101	27.8	24.99	88.42	98.41	HSPA1A	chr6	protein_coding	heat shock 70kDa protein 1A
ENSG00000233029.3	5.16303	-3.04709	0.00401325	0.0499175	0	0	0.04	0.02	RP11-439A17.9	chr1	antisense
ENSG00000277715.1	-1.69738	-1.02428	4.0181e-05	0.00171267	0.33	0.26	0.09	0.08	RP11-651L5.3	chr12	antisense
ENSG00000109832.12	2.76133	-2.43405	0.00140599	0.0244384	0.01	0	0.02	0.04	DDX25	chr11	protein_coding	DEAD (Asp-Glu-Ala-Asp) box helicase 25
ENSG00000135424.15	-1.40588	-1.29889	0.00115367	0.0211572	0.17	0.04	0.03	0.05	ITGA7	chr12	protein_coding	integrin, alpha 7
ENSG00000235760.3	3.20657	-2.74238	0.00356352	0.0467465	0	0.03	0.25	0.13	HCG2040054	chr2	antisense
ENSG00000167723.14	1.39515	1.15089	6.44962e-13	2.97078e-10	0.11	0.19	0.37	0.44	TRPV3	chr17	protein_coding	transient receptor potential cation channel, subfamily V, member 3
ENSG00000172348.14	-3.37987	-2.74118	0.00356352	0.0467465	0.06	0.03	0	0.01	RCAN2	chr6	protein_coding	regulator of calcineurin 2
ENSG00000164076.16	2.15914	-2.13484	0.00281675	0.0393739	0.01	0.02	0.06	0.09	CAMKV	chr3	protein_coding	CaM kinase-like vesicle-associated
ENSG00000272072.1	-1.4208	-0.775956	0.000145462	0.00463111	0.82	1.01	0.35	0.33	CTA-363E19.2	chr7	antisense
ENSG00000168062.9	1.26778	-0.692694	0.000545985	0.0122005	0.09	0.14	0.33	0.26	BATF2	chr11	protein_coding	basic leucine zipper transcription factor, ATF-like 2
ENSG00000254648.1	-5.2565	-3.04693	0.00401325	0.0499175	0.02	0.17	0	0	RP11-713P17.4	chr11	lincRNA
ENSG00000258988.1	5.31101	-2.96466	0.00202018	0.0310507	0	0	0.11	0.08	RP11-125H8.1	chr14	processed_pseudogene
ENSG00000233532.5	1.7925	-1.46241	0.000733862	0.0152864	0.14	0.06	0.48	0.23	LINC00460	chr13	lincRNA	long intergenic non-protein coding RNA 460
ENSG00000277611.1	5.16305	-3.04708	0.00401325	0.0499175	0	0	0.21	0.17	RP1-138B7.6	chr20	protein_coding
ENSG00000185296.8	5.16314	-3.04703	0.00401325	0.0499175	0	0	0.08	0.29	CTD-2139B15.1	chr5	processed_pseudogene
ENSG00000261713.6	-1.50651	-0.848754	8.85109e-05	0.00316357	0.15	0.28	0.04	0.11	SSTR5-AS1	chr16	processed_transcript	SSTR5 antisense RNA 1
ENSG00000232233.1	-1.1079	1.19909	3.79356e-09	7.57598e-07	1.39	1.56	0.83	0.53	RP11-573D15.2	chr3	lincRNA
ENSG00000260428.2	-1.19524	-0.100923	3.68645e-05	0.0016024	0.75	1.38	0.45	0.49	SCX	chr8	protein_coding	scleraxis basic helix-loop-helix transcription factor
ENSG00000175841.8	2.43256	-1.709	4.74033e-05	0.00195064	0.03	0.09	0.39	0.27	FAM172BP	chr3	processed_pseudogene	family with sequence similarity 172, member B, pseudogene
ENSG00000205177.6	1.21729	0.712698	2.18386e-08	3.50374e-06	0.44	1.53	2.58	2.13	C11orf91	chr11	protein_coding	chromosome 11 open reading frame 91
ENSG00000168754.13	-2.85258	-2.48949	0.00140599	0.0244384	0.08	0.04	0.01	0.01	FAM178B	chr2	protein_coding	family with sequence similarity 178, member B
ENSG00000225756.1	1.72653	-1.37991	0.000659614	0.0140387	0.08	0.05	0.17	0.24	DBH-AS1	chr9	antisense	DBH antisense RNA 1
ENSG00000253302.1	-5.66257	-2.81213	0.000513026	0.0116927	0.05	0.09	0	0	STAU2-AS1	chr8	antisense	STAU2 antisense RNA 1
ENSG00000225826.1	-1.11567	-0.690812	0.00198807	0.0310507	0.61	0.81	0.25	0.41	LINC00626	chr1	lincRNA	long intergenic non-protein coding RNA 626
ENSG00000235180.1	1.07661	-0.406961	0.00116506	0.0213119	0.4	0.27	0.65	0.75	LINC00601	chr10	lincRNA	long intergenic non-protein coding RNA 601
ENSG00000275180.1	1.19983	-0.9259	0.0023762	0.0349431	0.4	0.59	1.21	1.09	RP11-631N16.4	chr12	lincRNA
ENSG00000146197.8	5.44528	-2.88665	0.00101766	0.0192466	0	0	0.01	0.02	SCUBE3	chr6	protein_coding	signal peptide, CUB domain, EGF-like 3
ENSG00000261587.2	5.68101	-2.74241	0.000258817	0.00705278	0	0	0.27	0.05	TMEM249	chr8	protein_coding	transmembrane protein 249
ENSG00000154997.8	2.05333	-1.96524	0.00167903	0.0276845	0	0.03	0.08	0.06	2022-09-14	chr7	protein_coding	septin 14
ENSG00000272277.1	-1.99679	-0.57921	3.4991e-08	5.15089e-06	0.75	1.28	0.34	0.17	RP1-40E16.12	chr6	antisense
ENSG00000232415.1	1.74967	-1.4907	0.00112082	0.0206773	0.37	0.09	0.67	0.82	CTB-51J22.1	chr7	antisense
ENSG00000202415.1	2.68279	-2.09045	0.000311058	0.00813516	0.09	0.15	0.52	1.14	RN7SKP269	chr1	misc_RNA	RNA, 7SK small nuclear pseudogene 269
ENSG00000278959.1	-1.75816	-1.60904	0.00124924	0.0223533	0.22	0.09	0.05	0.04	RP11-455I9.1	chr7	TEC
ENSG00000254454.2	-3.69415	-2.54937	0.0005556	0.0122999	0.05	0.19	0	0.02	RCC2P6	chr11	processed_pseudogene	regulator of chromosome condensation 2 pseudogene 6
ENSG00000268069.2	-1.05418	-0.298547	0.000544218	0.0121705	1.13	0.58	0.35	0.45	RP5-1057I20.4	chr12	antisense
ENSG00000100365.14	6.29287	-2.32747	2.19719e-06	0.000168224	0	0	0.09	0.21	NCF4	chr22	protein_coding	neutrophil cytosolic factor 4, 40kDa
ENSG00000134258.16	3.20651	-2.74241	0.00356352	0.0467465	0	0.01	0.08	0.02	VTCN1	chr1	protein_coding	V-set domain containing T cell activation inhibitor 1
ENSG00000279277.1	-2.94381	-2.43308	0.00140599	0.0244384	0.14	0.1	0.01	0.01	RP11-861A13.3	chr3	TEC
ENSG00000232724.1	-5.25711	-3.04664	0.00401325	0.0499175	0.03	0.05	0	0	TRIM80P	chr17	unitary_pseudogene	tripartite motif containing 80, pseudogene
ENSG00000073734.8	2.39655	-2.27666	0.00276213	0.0388193	0.01	0.01	0.05	0.04	ABCB11	chr2	protein_coding	ATP-binding cassette, sub-family B (MDR/TAP), member 11
ENSG00000111879.18	-1.92692	-1.96348	0.00256962	0.0370249	0.06	0.04	0.01	0.02	FAM184A	chr6	protein_coding	family with sequence similarity 184, member A
ENSG00000272195.1	-1.03317	-0.274734	0.000544218	0.0121705	0.57	0.49	0.33	0.18	RP11-156E8.1	chr1	antisense
ENSG00000233800.3	-5.25894	-3.04575	0.00202018	0.0310507	0.47	0	0	0	RP11-295G24.4	chr9	sense_intronic
ENSG00000158055.15	1.50864	-1.30204	0.00169985	0.027851	0.05	0.04	0.13	0.13	GRHL3	chr1	protein_coding	grainyhead-like 3 (Drosophila)
ENSG00000248753.1	-6.15718	-2.48978	1.68886e-05	0.000904889	0.42	0.41	0	0	CTC-276P9.2	chr5	lincRNA
ENSG00000099953.9	-2.03426	-1.29947	1.30765e-05	0.000728897	0.29	0.16	0.03	0.07	MMP11	chr22	protein_coding	matrix metallopeptidase 11
ENSG00000273669.1	2.35942	-1.55011	1.85736e-05	0.000963385	0.13	0.11	0.57	0.66	RP11-405M12.4	chr18	lincRNA
ENSG00000255322.1	-2.72166	-1.88498	4.10314e-05	0.00173083	0.65	0.35	0.07	0.07	RP11-22P4.1	chr11	lincRNA
ENSG00000127129.9	-1.22148	-0.625305	0.000403214	0.0098841	0.6	0.59	0.27	0.24	EDN2	chr1	protein_coding	endothelin 2
ENSG00000272416.1	-5.66257	-2.81213	0.000513026	0.0116927	0.15	0.26	0	0	CTD-2081C10.7	chr5	lincRNA
ENSG00000277775.1	-1.06779	-0.577534	0.00165288	0.0274117	2.36	1.3	1.1	0.59	HIST1H3F	chr6	protein_coding	histone cluster 1, H3f
ENSG00000251455.1	1.73059	-1.64308	0.00137881	0.0242314	0.04	0.04	0.19	0.09	RP11-164P12.3	chr4	antisense
ENSG00000151136.14	5.44508	-2.88675	0.00101766	0.0192466	0	0	0.03	0	BTBD11	chr12	protein_coding	BTB (POZ) domain containing 11
ENSG00000205786.8	-3.26091	-2.22678	0.000135872	0.0044025	0.07	0.08	0.01	0	LINC01531	chr19	lincRNA	long intergenic non-protein coding RNA 1531
ENSG00000272192.1	5.16294	-3.04714	0.00401325	0.0499175	0	0	0.37	0	CTD-2532N20.1	chr8	lincRNA
ENSG00000118526.6	3.31963	-2.67533	0.00192477	0.0304867	0	0.01	0.06	0.01	TCF21	chr6	protein_coding	transcription factor 21
ENSG00000230177.1	-1.51896	-0.774931	3.65622e-05	0.00159718	1.44	1.09	0.34	0.52	RP5-1112D6.4	chr6	antisense
ENSG00000272659.1	1.57738	-1.15773	0.000462315	0.0109024	0.24	0.25	0.45	1.02	AP000295.10	chr21	lincRNA
ENSG00000161082.12	-1.99493	-1.32618	2.10266e-05	0.00105532	0.09	0.11	0.04	0.02	CELF5	chr19	protein_coding	CUGBP, Elav-like family member 5
ENSG00000235078.1	3.33924	-2.04757	2.27349e-05	0.00112524	0	0.05	0.22	0.37	AC142528.1	chr2	antisense
ENSG00000278570.4	-1.83883	-1.10913	1.24353e-05	0.000706019	0.28	0.09	0.04	0.06	NR2E3	chr15	protein_coding	nuclear receptor subfamily 2, group E, member 3
ENSG00000187642.9	-1.77752	-1.88494	0.00369315	0.0477884	0.13	0.05	0.01	0.04	PERM1	chr1	protein_coding	PPARGC1 and ESRR induced regulator, muscle 1
ENSG00000254017.1	5.56809	-2.81266	0.000513026	0.0116927	0	0	0.06	0.17	IGHEP2	chr9	IG_C_pseudogene	immunoglobulin heavy constant epsilon P2 (pseudogene)
ENSG00000250616.2	2.13207	-1.70882	0.000232188	0.00656244	0.03	0.06	0.22	0.21	RP11-455F5.3	chr16	antisense
ENSG00000282246.1	-1.53279	-0.90221	6.73847e-05	0.00256241	0.88	0.22	0.22	0.14	RP11-295P9.13	chr10	protein_coding
ENSG00000265692.1	-1.29938	-0.431498	6.89915e-05	0.00261655	0.58	0.39	0.16	0.23	RP13-516M14.4	chr17	lincRNA
ENSG00000174792.10	5.16305	-3.04708	0.00401325	0.0499175	0	0	0.06	0.05	C4orf26	chr4	protein_coding	chromosome 4 open reading frame 26
ENSG00000171560.14	-1.14352	-0.530709	0.000484857	0.0112849	0.32	0.09	0.03	0.15	FGA	chr4	protein_coding	fibrinogen alpha chain
ENSG00000279616.1	-2.94321	-2.43338	0.00140599	0.0244384	0.11	0.12	0.01	0.01	RP1-102H19.7	chr6	TEC
ENSG00000262663.1	-3.02957	-2.37882	0.000788814	0.0161252	0.44	0.43	0.05	0.05	RP11-497H17.1	chr17	lincRNA
ENSG00000107831.12	5.16311	-3.04705	0.00401325	0.0499175	0	0	0.06	0.12	FGF8	chr10	protein_coding	fibroblast growth factor 8 (androgen-induced)
ENSG00000100346.17	5.3111	-2.96461	0.00202018	0.0310507	0	0	0.01	0.02	CACNA1I	chr22	protein_coding	calcium channel, voltage-dependent, T type, alpha 1I subunit
ENSG00000231081.1	-2.48393	-2.04516	0.000353561	0.00901517	0.87	0.22	0.09	0.09	RP4-760C5.3	chr20	lincRNA
ENSG00000275880.1	1.29076	-0.407784	6.89915e-05	0.00261655	0.09	0.12	0.24	0.28	RP11-90L1.8	chr13	antisense
ENSG00000272843.1	-2.85103	-2.4902	0.00249347	0.0362199	0.2	0.34	0	0.07	RP11-313P13.5	chr7	antisense
ENSG00000263934.4	-1.03961	3.28153	4.8588e-20	6.93788e-17	22.7	10.55	10.05	5.84	SNORD3A	chr17	snoRNA	small nucleolar RNA, C/D box 3A
ENSG00000259151.2	1.70636	-1.52034	0.000809428	0.0163644	0.08	0.09	0.36	0.19	CAP2P1	chr14	transcribed_processed_pseudogene	CAP, adenylate cyclase-associated protein, 2 (yeast) pseudogene 1
ENSG00000249464.5	-1.23908	-1.08818	0.00194186	0.0306047	0.09	0.05	0.03	0.02	LINC01091	chr4	lincRNA	long intergenic non-protein coding RNA 1091
ENSG00000231616.8	-5.40489	-2.96436	0.00202018	0.0310507	0.02	0.08	0	0	RP11-575L7.4	chr9	antisense
ENSG00000131242.15	-1.3059	1.4734	6.10855e-14	3.71166e-11	0.47	0.31	0.16	0.15	RAB11FIP4	chr17	protein_coding	RAB11 family interacting protein 4 (class II)
ENSG00000280543.1	-2.41566	-2.08925	0.000599017	0.0130188	0.14	0.13	0.05	0	ASAP1-IT2	chr8	sense_intronic	ASAP1 intronic transcript 2
ENSG00000151117.8	2.85457	-1.18148	1.05782e-08	1.86477e-06	0.01	0.03	0.1	0.22	TMEM86A	chr11	protein_coding	transmembrane protein 86A
ENSG00000128536.15	1.08369	-0.157686	0.000342591	0.0087983	0.16	0.09	0.32	0.2	CDHR3	chr7	protein_coding	cadherin-related family member 3
ENSG00000153246.11	-1.11166	0.626445	4.34265e-07	4.36681e-05	0.27	0.12	0.1	0.08	PLA2R1	chr2	protein_coding	phospholipase A2 receptor 1, 180kDa
ENSG00000135519.6	-1.05116	-0.263057	0.000619989	0.0133931	0.22	0.26	0.08	0.15	KCNH3	chr12	protein_coding	potassium channel, voltage gated eag related subfamily H, member 3
ENSG00000275393.1	1.16782	-0.944908	0.00329867	0.044331	0.57	0.36	1.03	1.05	RP11-568J23.8	chr16	sense_intronic
ENSG00000131096.10	1.68044	-1.67546	0.00214025	0.0323907	0.09	0.08	0.38	0.19	PYY	chr17	protein_coding	peptide YY
ENSG00000238181.2	5.78608	-2.67525	0.000130667	0.00427936	0	0	0.11	0.15	AHCYP2	chr9	processed_pseudogene	adenosylhomocysteinase pseudogene 2
ENSG00000271414.1	-5.40458	-2.96451	0.00202018	0.0310507	0.06	0.49	0	0	RP11-751K21.1	chr7	processed_pseudogene
ENSG00000278601.1	-2.50075	-2.3264	0.00276213	0.0388193	0.32	0.31	0.1	0	RP11-348N5.9	chr10	antisense
ENSG00000204287.13	5.31119	-2.96456	0.00202018	0.0310507	0	0	0	0.19	HLA-DRA	chr6	protein_coding	major histocompatibility complex, class II, DR alpha
ENSG00000260412.1	-3.87239	-2.43368	0.000158622	0.00494533	0.02	0.04	0	0	RP11-438B23.2	chr9	sense_overlapping
ENSG00000229758.2	-5.25711	-3.04664	0.00401325	0.0499175	0.28	0.49	0	0	DYNLT3P2	chr2	processed_pseudogene	dynein, light chain, Tctex-type 3 pseudogene 2
ENSG00000204584.1	1.93712	-0.814368	8.05835e-07	7.18118e-05	0.01	0.15	0.28	0.38	RP11-304F15.3	chr17	antisense
ENSG00000239247.3	-5.25833	-3.04605	0.00401325	0.0499175	0.63	0.16	0	0	RN7SL589P	chr4	misc_RNA	RNA, 7SL, cytoplasmic 589, pseudogene
ENSG00000052850.5	-2.1784	-2.00395	0.00102464	0.0193401	0.06	0.04	0.01	0.01	ALX4	chr11	protein_coding	ALX homeobox 4
ENSG00000221949.5	1.6962	-0.813806	2.04227e-05	0.00103764	0.07	0.14	0.29	0.4	LINC01465	chr12	lincRNA	long intergenic non-protein coding RNA 1465
ENSG00000231189.1	-2.34461	-2.13428	0.00169163	0.0277322	0.17	0.45	0	0.12	AC013448.1	chr2	lincRNA
ENSG00000235236.1	3.52242	-2.54982	0.0005556	0.0122999	0	0.04	0.39	0.26	RP13-131K19.1	chr3	antisense
ENSG00000279529.1	-1.69588	-1.02496	4.0181e-05	0.00171267	0.19	0.24	0.05	0.08	CTD-3222D19.8	chr19	TEC
ENSG00000100271.16	-1.00754	-0.364692	0.0014929	0.0253624	0.56	0.49	0.3	0.21	TTLL1	chr22	protein_coding	tubulin tyrosine ligase-like family member 1
ENSG00000279213.1	-5.25833	-3.04605	0.00401325	0.0499175	0.37	0.09	0	0	SNX18P10	chr21	processed_pseudogene	sorting nexin 18 pseudogene 10
ENSG00000116701.14	1.52144	1.74164	7.69542e-20	1.0465e-16	0.5	0.69	1.83	1.61	NCF2	chr1	protein_coding	neutrophil cytosolic factor 2
ENSG00000164089.8	-1.11408	-0.548556	0.00122372	0.0220348	0.33	0.39	0.16	0.17	ETNPPL	chr4	protein_coding	ethanolamine-phosphate phospho-lyase
ENSG00000181240.13	-1.34565	-0.11082	2.98026e-06	0.000214939	0.63	0.81	0.23	0.33	SLC25A41	chr19	protein_coding	solute carrier family 25, member 41
ENSG00000264920.1	-1.56883	-1.10957	0.000138924	0.00447281	1.62	0.64	0.34	0.39	RP11-6N17.4	chr17	processed_transcript
ENSG00000019102.11	2.08189	-1.74274	0.000379725	0.00947917	0.04	0.07	0.25	0.22	VSIG2	chr11	protein_coding	V-set and immunoglobulin domain containing 2
ENSG00000185760.15	5.44525	-2.88666	0.00101766	0.0192466	0	0	0.02	0.02	KCNQ5	chr6	protein_coding	potassium channel, voltage gated KQT-like subfamily Q, member 5
ENSG00000171847.10	2.67035	-2.4909	0.00249347	0.0362199	0	0.02	0.05	0.1	FAM90A1	chr12	protein_coding	family with sequence similarity 90, member A1
ENSG00000263201.1	5.16308	-3.04706	0.00401325	0.0499175	0	0	0.08	0.1	CTC-479C5.6	chr16	antisense
ENSG00000164161.9	5.1632	-3.047	0.00401325	0.0499175	0	0	0	0.02	HHIP	chr4	protein_coding	hedgehog interacting protein
ENSG00000198771.10	3.70031	-2.4343	0.000158622	0.00494533	0	0.01	0.02	0.11	RCSD1	chr1	protein_coding	RCSD domain containing 1
ENSG00000147003.5	-1.26605	0.108037	1.53481e-06	0.000125591	1.07	0.58	0.33	0.34	TMEM27	chrX	protein_coding	transmembrane protein 27
ENSG00000275734.1	-3.69539	-2.54879	0.0005556	0.0122999	0.29	0.29	0.04	0	RP11-368I7.6	chr16	antisense
ENSG00000215014.4	1.4728	-1.04756	0.000523025	0.011845	0.11	0.08	0.27	0.24	RP5-832C2.5	chr1	lincRNA
ENSG00000253706.5	5.44528	-2.88665	0.00101766	0.0192466	0	0	0.03	0.05	RP11-758M4.4	chr8	antisense
ENSG00000261229.5	3.07913	-2.22809	0.000245104	0.00681567	0	0.02	0.13	0.09	MTHFS	chr15	lincRNA	5,10-methenyltetrahydrofolate synthetase (5-formyltetrahydrofolate cyclo-ligase)
ENSG00000197245.4	-5.77693	-2.74118	0.000258817	0.00705278	0.15	0.08	0	0	FAM110D	chr1	protein_coding	family with sequence similarity 110, member D
ENSG00000267249.1	-1.75089	-1.4887	0.000733862	0.0152864	0.81	0.37	0.1	0.24	RP11-973H7.3	chr18	sense_intronic
ENSG00000278705.1	-1.4748	-1.54828	0.00256869	0.0370249	1.01	0.72	0.33	0.28	HIST1H4B	chr6	protein_coding	histone cluster 1, H4b
ENSG00000111335.12	2.31491	-2.32715	0.00276213	0.0388193	0.01	0	0.05	0.02	OAS2	chr12	protein_coding	2'-5'-oligoadenylate synthetase 2, 69/71kDa
ENSG00000233791.5	5.16308	-3.04706	0.00401325	0.0499175	0	0	0.04	0.05	LINC01136	chr1	lincRNA	long intergenic non-protein coding RNA 1136
ENSG00000119922.8	1.06287	3.89158	1.64465e-24	3.61291e-21	2.24	2.54	4.83	5.14	IFIT2	chr10	protein_coding	interferon-induced protein with tetratricopeptide repeats 2
ENSG00000177669.3	-5.2565	-3.04693	0.00401325	0.0499175	0.02	0.13	0	0	MBOAT4	chr8	protein_coding	membrane bound O-acyltransferase domain containing 4
ENSG00000271843.1	3.31981	-2.67524	0.00192477	0.0304867	0	0.04	0.19	0.32	RP11-245J9.5	chr3	lincRNA
ENSG00000278996.1	-1.32719	-0.159683	1.56768e-05	0.000847912	0.07	0.75	0.09	0.25	CH507-513H4.1	chr21	lincRNA
ENSG00000138378.17	-1.11424	-0.594465	0.00143719	0.024721	0.18	0.24	0.05	0.14	STAT4	chr2	protein_coding	signal transducer and activator of transcription 4
ENSG00000121797.9	3.55944	-1.88723	2.03034e-06	0.000157134	0	0.02	0.12	0.19	CCRL2	chr3	protein_coding	chemokine (C-C motif) receptor-like 2
ENSG00000243479.3	-2.85167	-2.48993	0.00249347	0.0362199	0.19	0.19	0.02	0.02	MNX1-AS1	chr7	lincRNA	MNX1 antisense RNA 1 (head to head)
ENSG00000260139.6	-1.24926	-0.212901	1.79294e-05	0.000942964	0.25	0.17	0.11	0.07	CSPG4P13	chr15	transcribed_unprocessed_pseudogene	chondroitin sulfate proteoglycan 4 pseudogene 13
ENSG00000226690.6	3.20635	-2.74218	0.00356352	0.0467465	0.03	0	0.11	0.16	AC005281.1	chr7	lincRNA
ENSG00000249599.1	5.31119	-2.96456	0.00202018	0.0310507	0	0	0	0.48	BMPR1B-AS1	chr4	lincRNA	BMPR1B antisense RNA 1 (head to head)
ENSG00000149926.13	-2.11103	-2.04635	0.00273373	0.0387251	0.1	0.11	0.04	0.01	FAM57B	chr16	protein_coding	family with sequence similarity 57, member B
ENSG00000251615.3	1.96593	-1.64318	0.000372043	0.00935283	0.03	0.03	0.13	0.09	RP11-774O3.3	chr4	lincRNA
ENSG00000144583.4	1.53029	1.29791	3.79992e-16	3.19171e-13	0.12	0.34	0.69	0.69	2022-03-04	chr2	protein_coding	membrane-associated ring finger (C3HC4) 4, E3 ubiquitin protein ligase
ENSG00000103522.15	-1.5198	-0.983175	0.000165374	0.00511673	0.13	0.1	0.06	0.02	IL21R	chr16	protein_coding	interleukin 21 receptor
ENSG00000254338.1	-1.9705	-1.60945	0.000355844	0.00905721	1.13	0.76	0.17	0.29	MAFA-AS1	chr8	antisense	MAFA antisense RNA 1
ENSG00000273456.1	-1.60662	-1.57977	0.00385185	0.0492837	0.33	0.76	0.18	0.18	RP11-686O6.2	chr2	lincRNA
ENSG00000167850.3	1.38206	-1.02701	0.000523025	0.011845	0.09	0.18	0.44	0.27	CD300C	chr17	protein_coding	CD300c molecule
ENSG00000203411.3	-2.50006	-2.32665	0.00276213	0.0388193	0.56	0.9	0	0.24	Metazoa_SRP	chr15	misc_RNA
ENSG00000214049.6	1.06	0.185325	3.35324e-05	0.00149726	0.21	0.32	0.62	0.48	UCA1	chr19	processed_transcript	urothelial cancer associated 1 (non-protein coding)
ENSG00000254991.1	1.13418	-0.611865	0.00124098	0.0222472	0.34	0.38	0.98	0.59	RP13-631K18.3	chr11	lincRNA
ENSG00000280102.2	-1.03599	2.4739	6.91479e-15	4.81641e-12	104.04	61.25	50.31	28.87	RN7SL2	chr14	miRNA	RNA, 7SL, cytoplasmic 2
ENSG00000281887.2	5.31095	-2.96469	0.00202018	0.0310507	0	0	0.08	0.02	GIMAP1-GIMAP5	chr7	protein_coding	GIMAP1-GIMAP5 readthrough
ENSG00000229153.5	-1.11627	-0.547676	0.000902319	0.0178536	0.18	0.13	0.1	0.04	EPHA1-AS1	chr7	antisense	EPHA1 antisense RNA 1
ENSG00000162068.1	-1.22512	-0.67404	0.000652575	0.0139783	0.32	0.39	0.08	0.22	NTN3	chr16	protein_coding	netrin 3
ENSG00000105519.12	-1.19134	0.0592038	7.3384e-06	0.000440273	0.39	0.21	0.13	0.13	CAPS	chr19	protein_coding	calcyphosine
ENSG00000271983.1	-2.36109	-1.8851	0.000225126	0.00641631	0.85	0.49	0.05	0.2	RP11-28H5.2	chr15	lincRNA
ENSG00000160752.14	5.57944	12.9491	0	0	179.71	165.77	7728.02	8705.88	FDPS	chr1	protein_coding	farnesyl diphosphate synthase
ENSG00000181856.14	-1.06161	0.728689	6.86004e-07	6.29932e-05	0.63	0.35	0.28	0.18	SLC2A4	chr17	protein_coding	solute carrier family 2 (facilitated glucose transporter), member 4
ENSG00000253846.2	-1.42078	-0.904843	0.000274558	0.007404	0.08	0.11	0.03	0.04	PCDHGA10	chr5	protein_coding	protocadherin gamma subfamily A, 10
ENSG00000174990.4	2.76137	-2.43433	0.00140599	0.0244384	0	0	0.04	0.01	CA5A	chr16	protein_coding	carbonic anhydrase VA, mitochondrial
ENSG00000259621.1	-1.03703	-0.641986	0.00351377	0.0465428	2.32	2.95	1.81	0.74	RP11-654A16.1	chr15	antisense
ENSG00000261379.1	-1.03734	-0.595441	0.00297756	0.040901	0.46	0.92	0.42	0.26	RP11-395N3.1	chr2	sense_intronic
ENSG00000171401.14	-1.58743	-1.27509	0.000390427	0.00967866	0.28	0.23	0.03	0.14	KRT13	chr17	protein_coding	keratin 13, type I
ENSG00000253603.1	-2.75569	-2.54789	0.00249347	0.0362199	0.65	0.04	0	0.09	CTA-397H3.3	chr8	antisense
ENSG00000136425.12	-1.15456	0.695253	1.48545e-07	1.76022e-05	1.08	1	0.41	0.51	CIB2	chr15	protein_coding	calcium and integrin binding family member 2
ENSG00000100867.14	1.08742	1.49304	2.38867e-10	6.14556e-08	0.63	1.12	2.05	1.7	DHRS2	chr14	protein_coding	dehydrogenase/reductase (SDR family) member 2
ENSG00000088386.15	-3.49362	-2.6738	0.00103577	0.0194858	0.07	0.02	0	0.01	SLC15A1	chr13	protein_coding	solute carrier family 15 (oligopeptide transporter), member 1
ENSG00000149927.17	-1.77615	-1.25037	7.71819e-05	0.00284775	0.24	0.2	0.05	0.08	DOC2A	chr16	protein_coding	double C2-like domains, alpha
ENSG00000228137.1	-1.10596	0.359506	7.24665e-06	0.000435684	3.77	3.86	1.65	1.87	AP001469.7	chr21	antisense
ENSG00000134962.6	-5.53916	-2.88639	0.00101766	0.0192466	0.01	0.04	0	0	KLB	chr4	protein_coding	klotho beta
ENSG00000170500.12	-1.22662	-0.189347	2.16855e-05	0.00108268	0.09	0.06	0.03	0.04	LONRF2	chr2	protein_coding	LON peptidase N-terminal domain and ring finger 2
ENSG00000066468.20	-2.04888	-0.962223	5.07077e-07	4.95929e-05	0.12	0.08	0.01	0.03	FGFR2	chr10	protein_coding	fibroblast growth factor receptor 2
ENSG00000196668.3	-2.15755	-1.64067	0.000142903	0.0045598	0.28	0.12	0.01	0.07	LINC00173	chr12	processed_transcript	long intergenic non-protein coding RNA 173
ENSG00000272425.1	2.76112	-2.43415	0.00140599	0.0244384	0.03	0	0.13	0.04	RP11-363E6.4	chr8	lincRNA
ENSG00000260118.1	1.91836	-1.67571	0.000595769	0.0129977	0.02	0.1	0.12	0.37	RP6-201G10.2	chrX	lincRNA
ENSG00000273162.1	-1.129	0.862383	5.89521e-08	8.05528e-06	2.1	2.28	1.05	0.95	RP11-108L7.15	chr10	lincRNA
ENSG00000123342.15	1.43432	0.707423	1.62891e-10	4.43031e-08	0.23	0.38	0.88	0.8	MMP19	chr12	protein_coding	matrix metallopeptidase 19
ENSG00000185966.3	2.67029	-2.49093	0.00249347	0.0362199	0	0.08	0.27	0.32	LCE3E	chr1	protein_coding	late cornified envelope 3E
ENSG00000183091.19	3.20638	-2.74217	0.00356352	0.0467465	0	0	0	0.01	NEB	chr2	protein_coding	nebulin
ENSG00000158683.7	3.55907	-1.88711	2.03034e-06	0.000157134	0	0	0.03	0.04	PKD1L1	chr7	protein_coding	polycystic kidney disease 1 like 1
ENSG00000100027.14	-1.6184	-0.363168	4.30328e-07	4.34251e-05	0.28	0.17	0.09	0.06	YPEL1	chr22	protein_coding	yippee-like 1 (Drosophila)
ENSG00000228109.1	-1.30265	-0.625173	0.000170226	0.00522721	0.82	0.77	0.35	0.28	MFI2-AS1	chr3	antisense	MFI2 antisense RNA 1
CPM, count per million; chr, chromosome; ENSG, prefix of gene ID, ensembl gene; FDR, false discovery rate.
